# Supplementary material for: Lithosphere tearing along STEP faults and synkinematic formation of lherzolite and wehrlite in the shallow subcontinental mantle
Source: Copernicus journal article supplement (doi:10.5194/se-2019-32), 2019-02-27

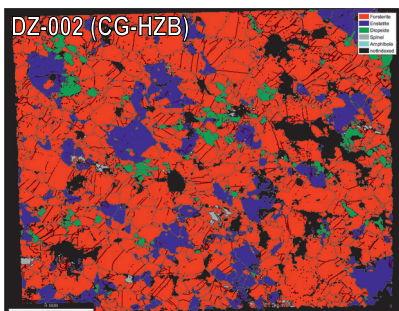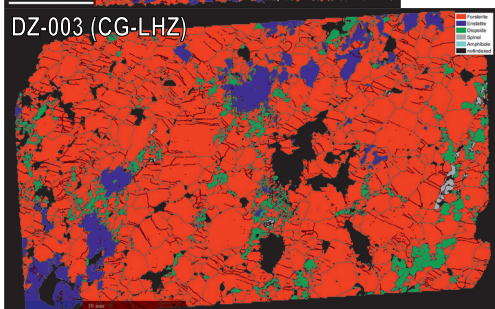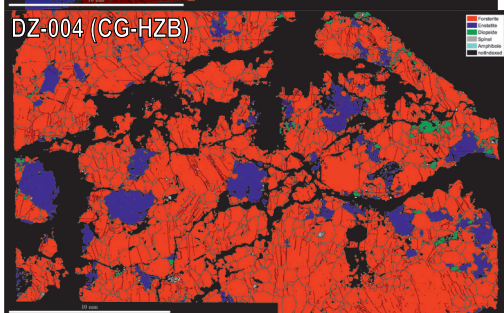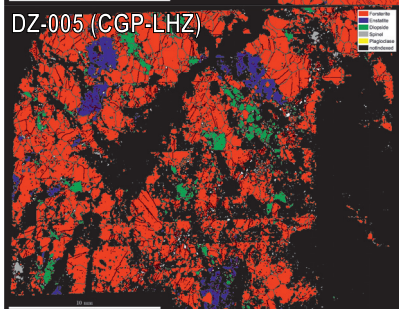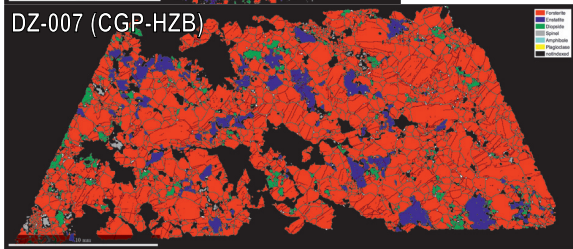

## OLIVINE

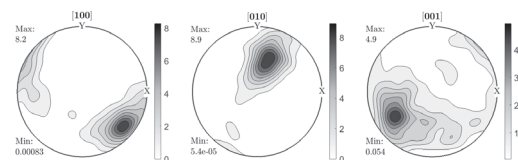

## ORTHOPYROXENE

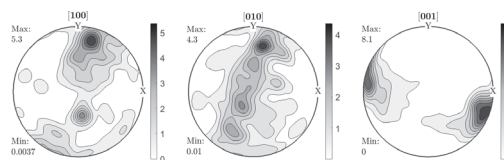

## CLINOPYROXENE

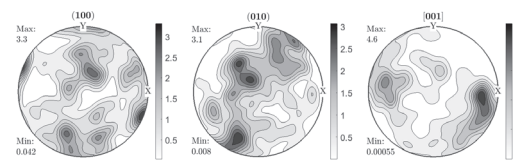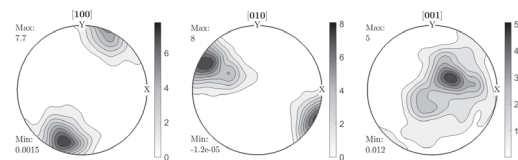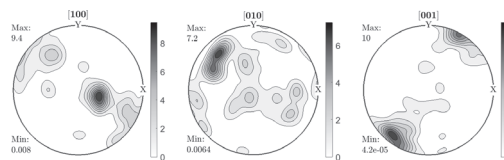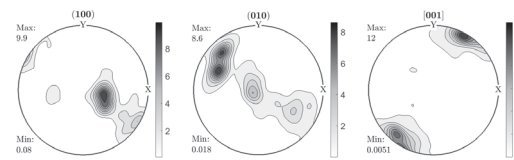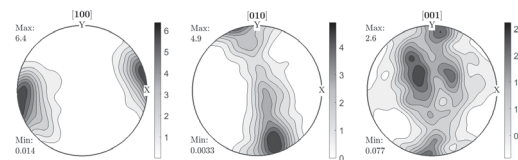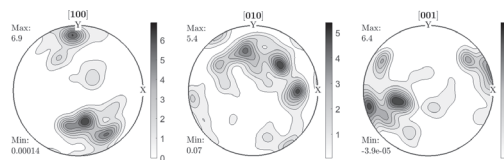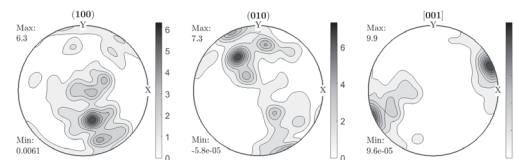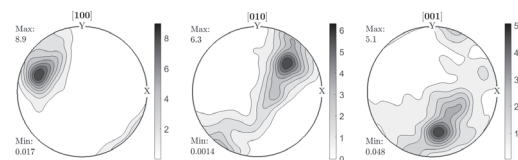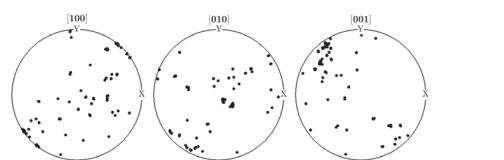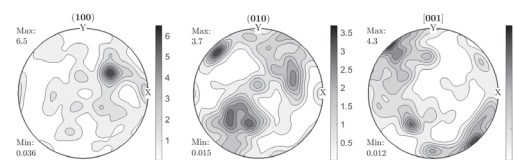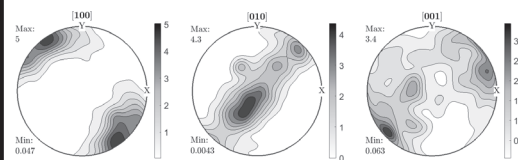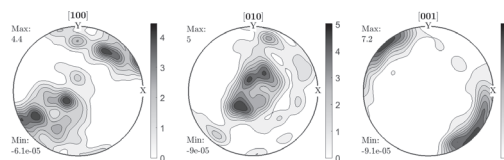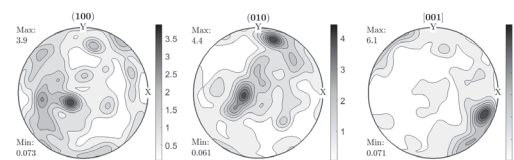



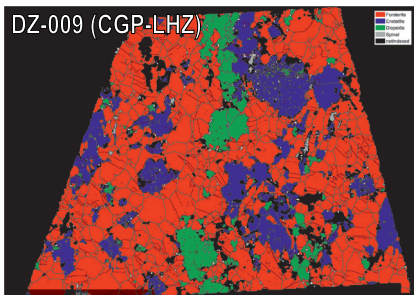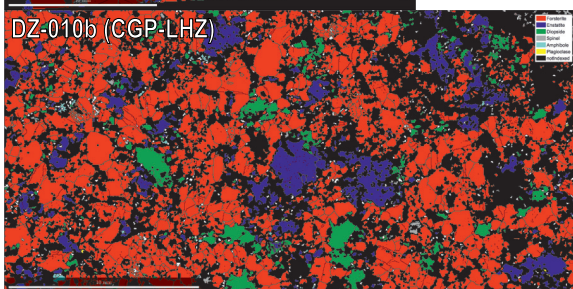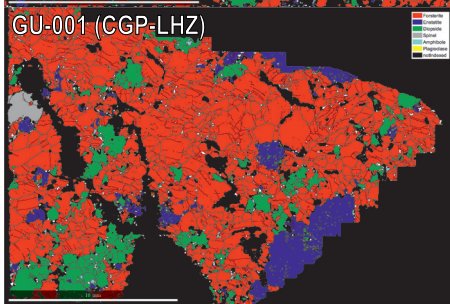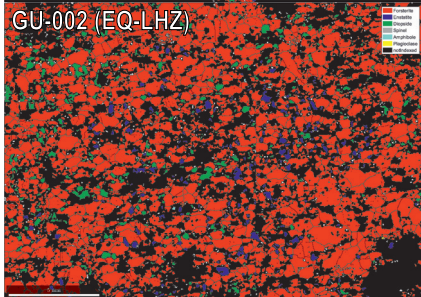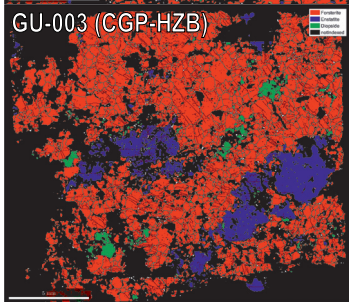

## OLIVINE

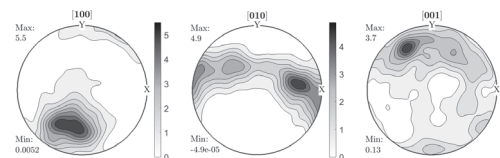

## ORTHOPYROXENE

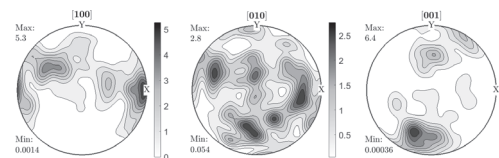

## CLINOPYROXENE

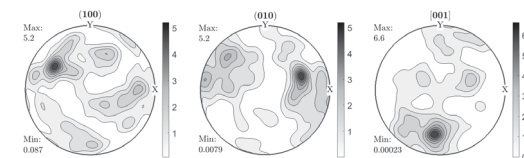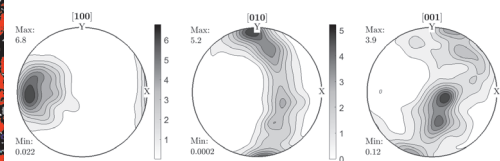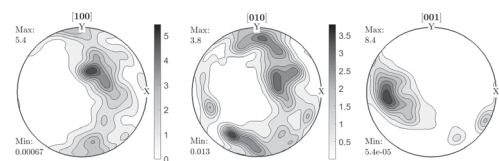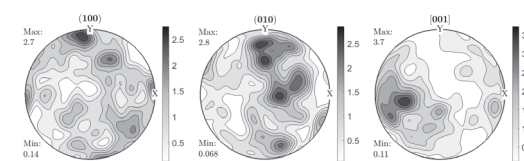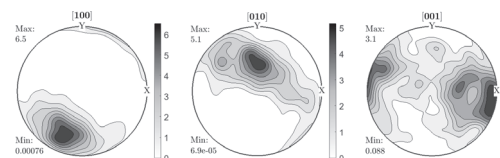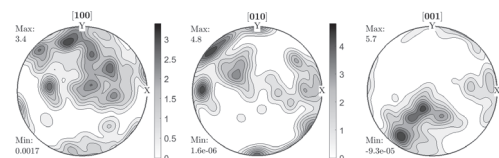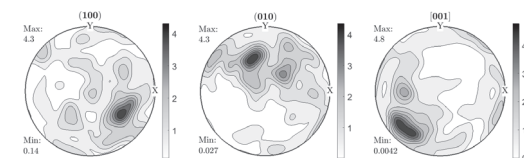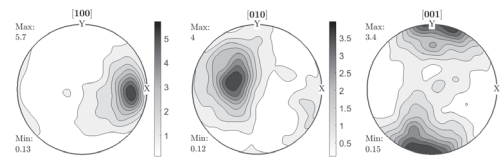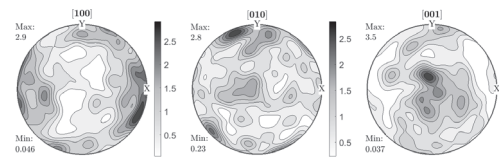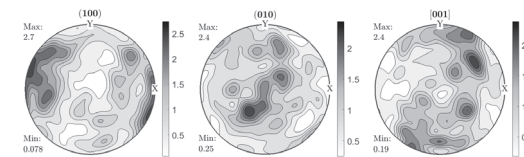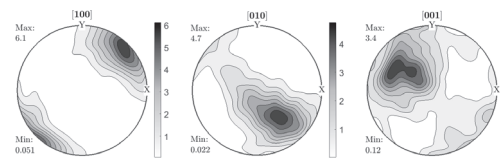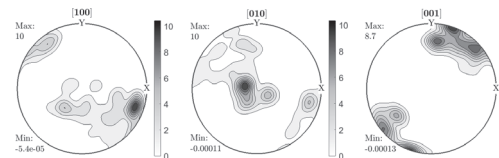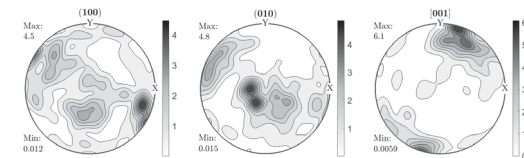



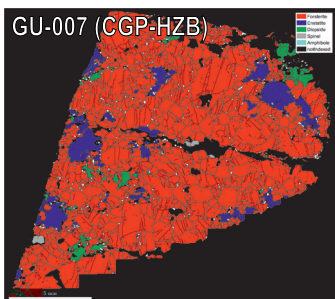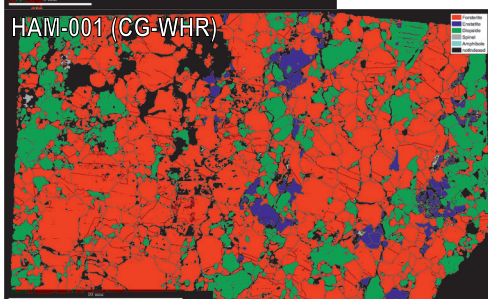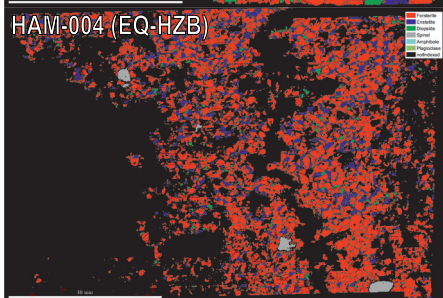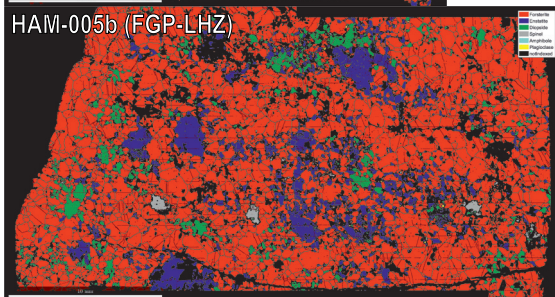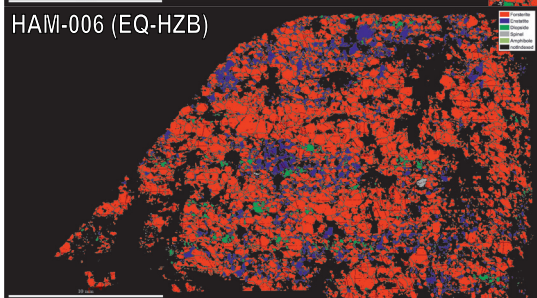

## OLIVINE

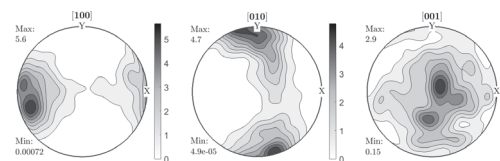

## ORTHOPYROXENE

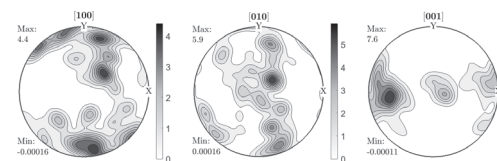

## CLINOPYROXENE

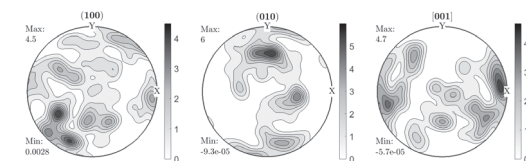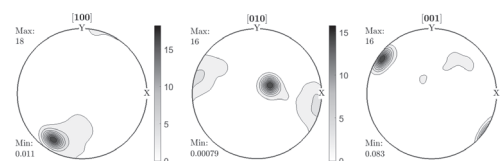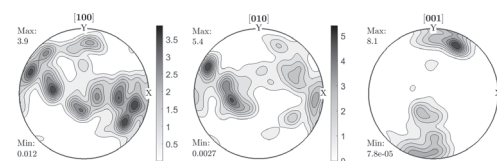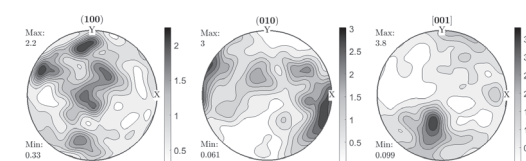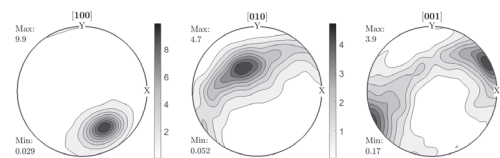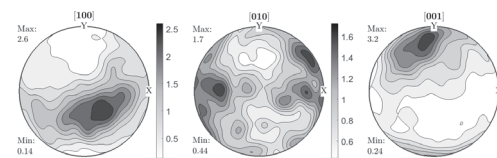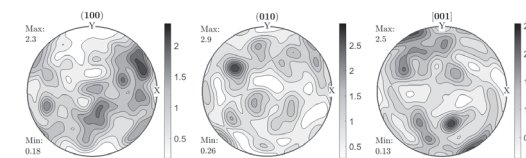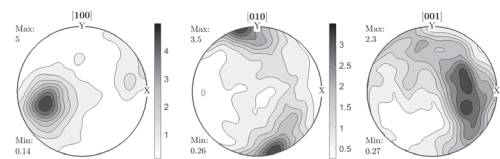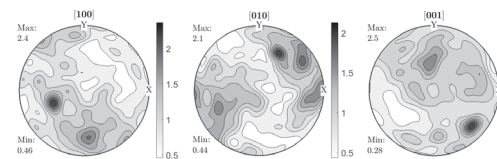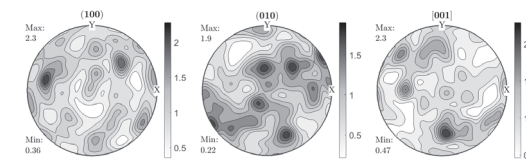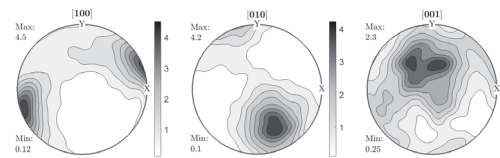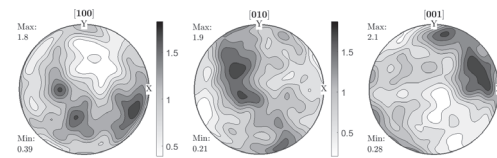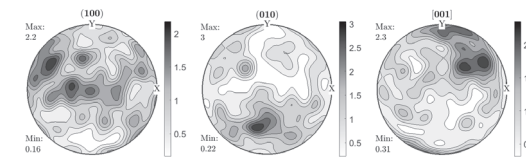



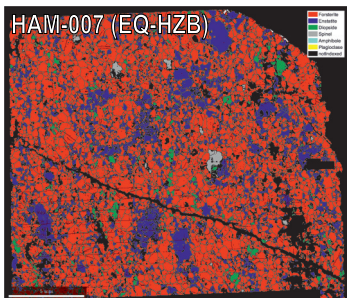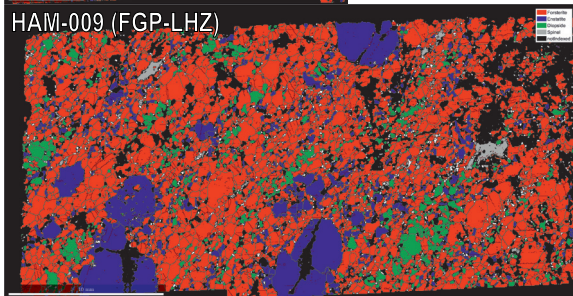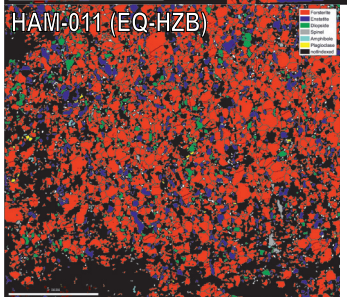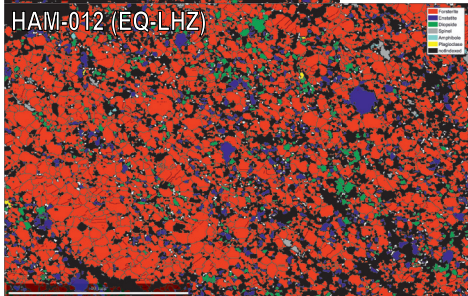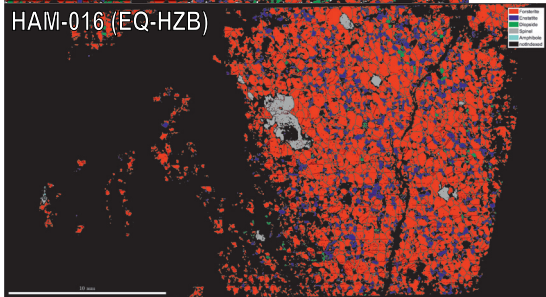

## OLIVINE

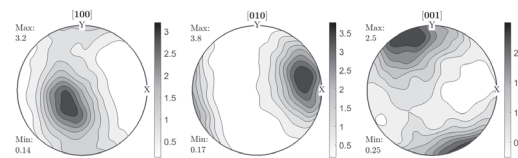

## ORTHOPYROXENE

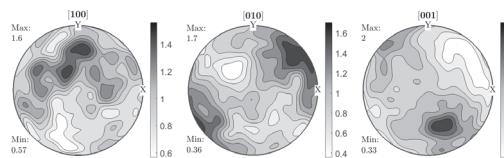

## CLINOPYROXENE

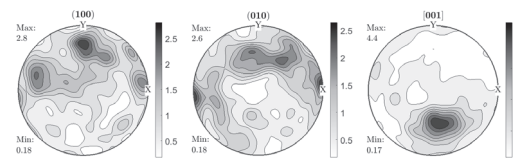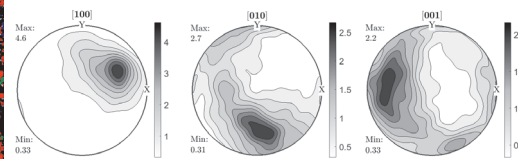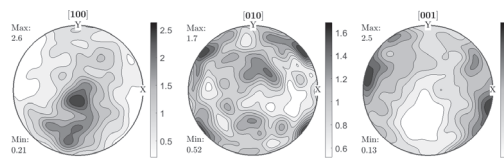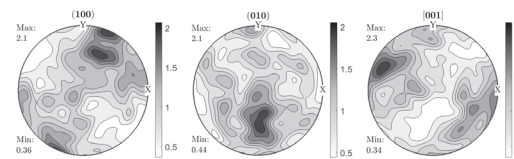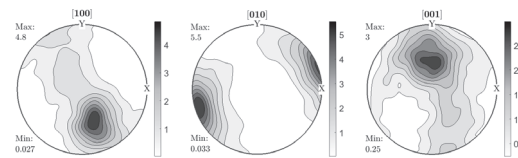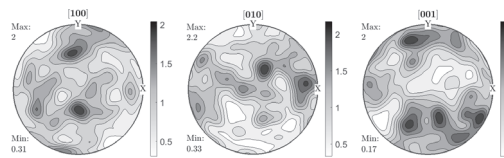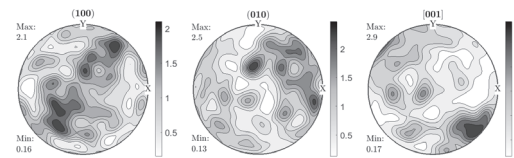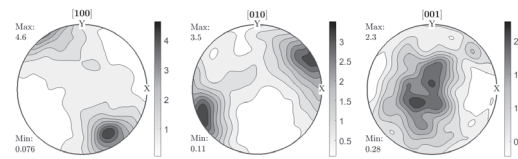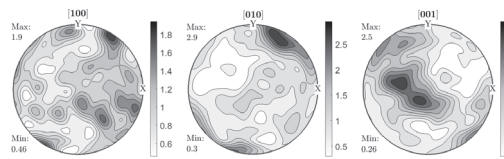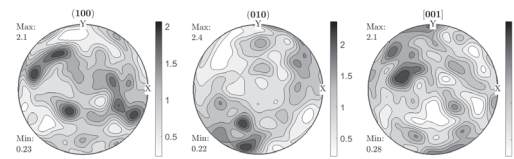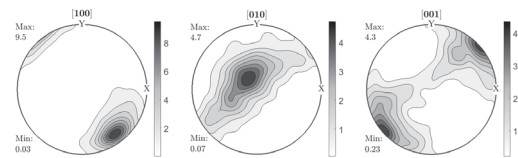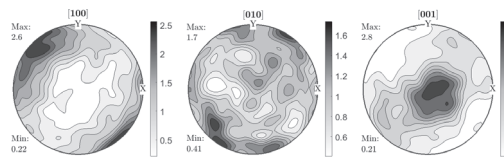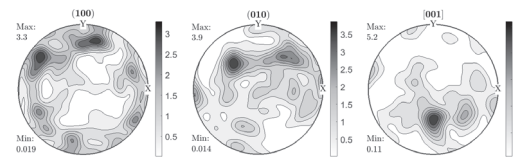



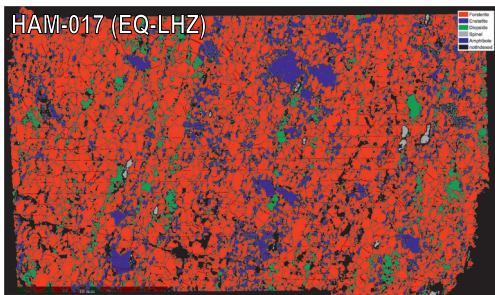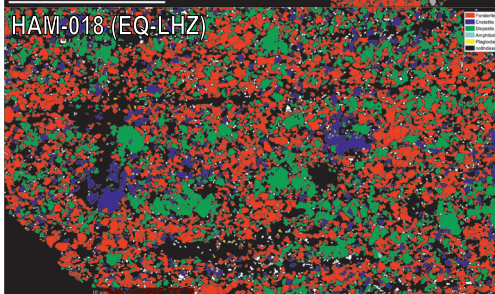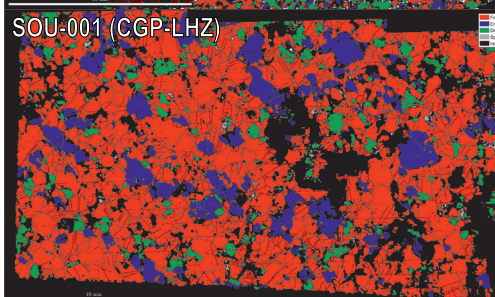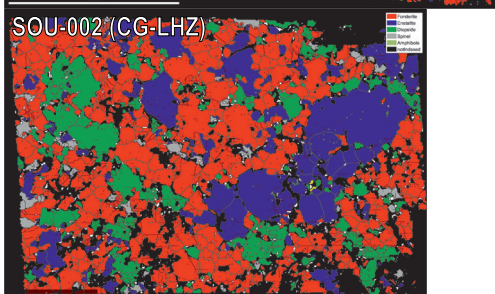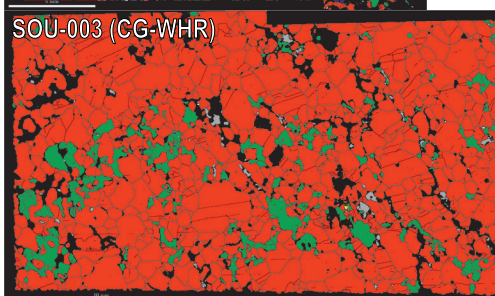

## OLIVINE

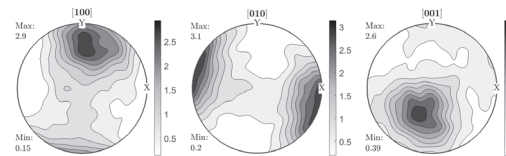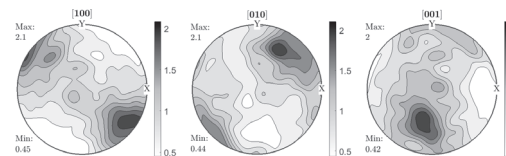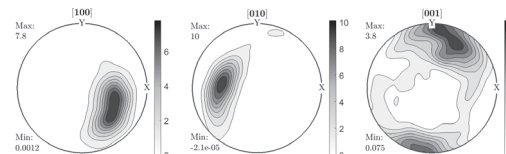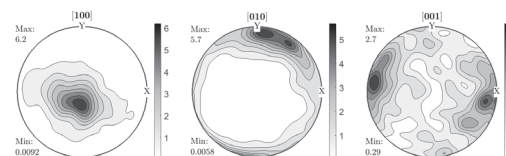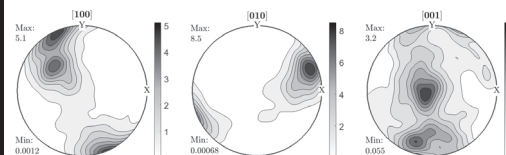

## ORTHOPYROXENE

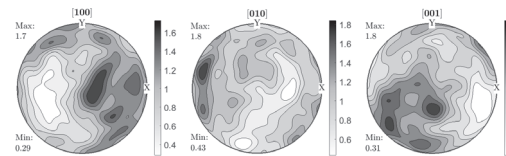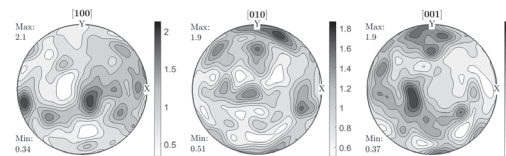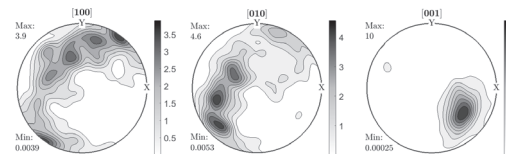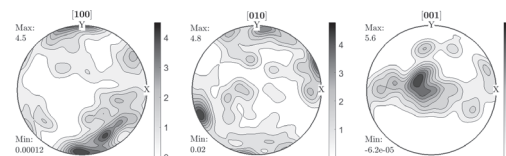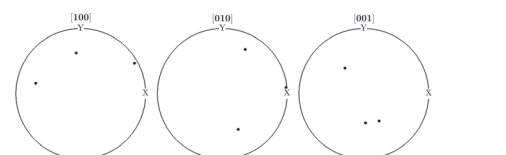

## CLINOPYROXENE

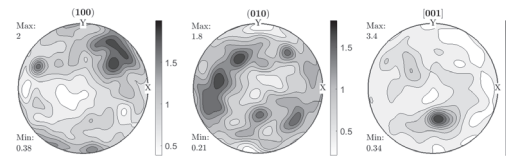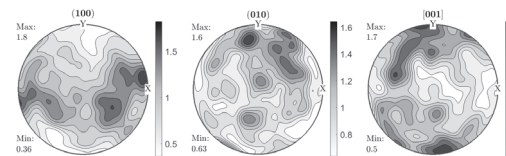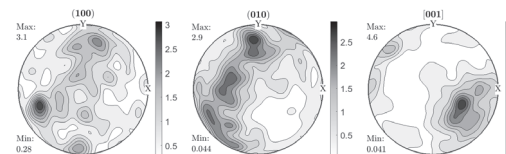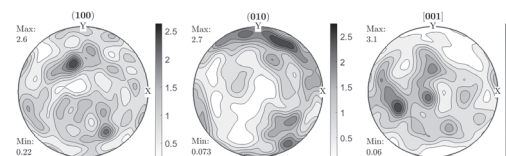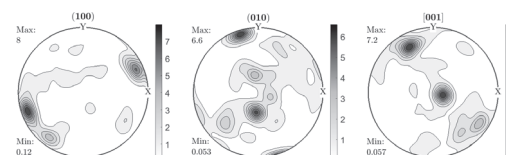

Supplement: Supplementary file 1 [file se-2019-32-supplement.zip]
