# Supplementary material for: Lithosphere tearing along STEP faults and synkinematic formation of lherzolite and wehrlite in the shallow subcontinental mantle
Source: Copernicus journal article supplement (doi:10.5194/se-2019-32), 2019-02-27
Supplement: Supplementary file 1 [file Hidas_et_al_Table_S1.xlsx]

## Sheet: Table_S01_EMPA-EBSD
No.	Sample	Mineral	Grain	Site	Spot no.	EPMA Label	SiO2	TiO2	Al2O3	Cr2O3	FeO*	MnO	NiO	MgO	CaO	Na2O	K2O	Total	Si	Al	AlIV	AlVI	Fe*	Cr	Ti	Mn	Mg	Ca	Na	K	Ni	TOTAL	mg#	cr#	TBK-0.5	TBK-0.8	TBK-1.5	TWES	Ac	Jd	FeCaTs	CrCaTs	AlCaTs	DiHd	EnFe	Wo	En	Fs	En+Fe
1	DZ-003	Ol	1	c	1	DZ-3-ol1-c	39.56		0.01	0.05	9.43	0.11	0.41	50.83	0.1			100.5	0.968486	0.000288531			0.193071	0.000967792		0.00228095	1.85509	0.00262307			0.00807427	3.03089	0.905735
2	DZ-003	Ol	1	r	1	DZ-3-ol1-r	40.19		0.02	0.03	9.18	0.14	0.37	50.21	0.13			100.27	0.983031	0.000576547			0.187785	0.000580157		0.00290043	1.83083	0.00340695			0.00728003	3.01639	0.906974
3	DZ-003	Ol	5	r	1	DZ-3-opx1-r	40.55		0.03	0.08	9.72	0.2		50.4	0.12	0.04		101.14	0.983936	0.000857933			0.197247	0.00153476		0.00411047	1.82312	0.00311983	0.00188184			3.01581	0.902371
4	DZ-003	Ol	2	c	1	DZ-3-ol2c	40.27	0.02	0.03	0.07	9.6	0.13	0.38	50.87	0.14			101.51	0.975441	0.000856439			0.194473	0.00134058	0.00036446	0.00266715	1.83692	0.00363346			0.00740432	3.0231	0.904266
5	DZ-003	Ol	2	r	1	DZ-3-ol2r	40.97		0.03	0.04	9.07	0.19	0.4	50.66	0.12			101.48	0.988663	0.000853217			0.183045	0.000763163		0.00388348	1.82245	0.00310268			0.0077647	3.01053	0.908728
6	DZ-003	Ol	3	c	1	DZ-3-ol3-c	41.04	0.02	0.02	0.05	9.4	0.12	0.37	50.81	0.13			101.96	0.986833	0.00056679			0.189031	0.000950564	0.000361798	0.00244401	1.82135	0.00334929			0.00715683	3.01205	0.905973
7	DZ-003	Ol	3	r	1	DZ-3-ol3-r	40.77	0.02	0.01	0.04	9.35	0.16	0.42	50.69	0.13			101.59	0.98458	0.00028462			0.188838	0.000763739	0.000363363	0.00327277	1.82491	0.00336377			0.00815909	3.01453	0.906225
8	DZ-003	Ol	6	r	1	DZ-3-opx3-r	40.92		0.03	0.1	9.49	0.13		49.98	0.17			100.82	0.993512	0.000858449			0.192696	0.00191961		0.00267342	1.80902	0.00442242				3.0051	0.903735
9	DZ-003	Ol	4	c	1	DZ-3-ol4-c	40.53			0.08	9.19	0.16	0.4	50.92	0.14			101.42	0.980421				0.185917	0.00153003		0.00327825	1.83626	0.00362858			0.00778356	3.01881	0.908061
10	DZ-003	Ol	4	c	2	DZ-3-ol4-c	39.92	0.01	0.01	0.04	9.59	0.16	0.37	51.37	0.13			101.6	0.967211	0.000285553			0.19432	0.000766241	0.000182276	0.00328349	1.85545	0.00337479			0.00721132	3.03208	0.905199
11	DZ-003	Ol	4	r	1	DZ-3-ol4-r	40.53	0.01		0.06	9.26	0.15	0.37	50.97	0.13			101.48	0.979941				0.187242	0.00114696	0.000181896	0.00307185	1.83716	0.00336775			0.00719626	3.0193	0.907508
12	HAM-001	Ol	1	c	1	HAM-1-ol1-c	39.82	0.03		0.04	9.25	0.16	0.39	50.04	0.12			99.85	0.979317				0.190253	0.00077778	0.000555064	0.00333294	1.83463	0.0031621			0.00771558	3.01974	0.906042
13	HAM-001	Ol	1	r	1	HAM-1-ol1-r	39.95	0.03	0.01	0.04	9.8	0.15	0.33	50	0.11			100.42	0.978839	0.000288769			0.200812	0.000774871	0.000552988	0.00311294	1.8263	0.00288775			0.00650415	3.02008	0.900937
14	HAM-001	Ol	2	c	1	HAM-1-ol2-c	40.3	0.01		0.03	9.33	0.19	0.39	50.32	0.1			100.67	0.982625				0.190253	0.000578334	0.000183435	0.00392393	1.82908	0.0026125			0.00764944	3.0169	0.905784
15	HAM-001	Ol	2	r	1	HAM-1-ol2-r	40.94		0.04	0.04	9.29	0.17	0.39	50.39	0.08			101.34	0.989902	0.00113988			0.187857	0.000764679		0.0034816	1.81634	0.00207256			0.00758563	3.00915	0.906268
16	HAM-012	Ol	1	c	1	HAM012-ol1-c	39.5	0.01	0.01	0.02	9.39	0.12	0.4	50.19	0.08			99.72	0.973866	0.000290575			0.193614	0.000389859	0.000185482	0.00250593	1.84471	0.00211332			0.00793313	3.02561	0.905013
17	HAM-012	Ol	1	r	1	HAM012-ol1-r	39.54	0.01		0.04	9.51	0.18	0.43	50.88	0.06			100.65	0.967289				0.194567	0.000773668	0.000184043	0.00372973	1.85556	0.00157269			0.00846195	3.03214	0.905095
18	HAM-012	Ol	2	c	1	HAM012-ol2c	40.68		0.01	0.03	9.3	0.16	0.37	50.57	0.08			101.2	0.985598	0.000285545			0.188439	0.000574665		0.0032834	1.8265	0.00207674			0.00721112	3.01397	0.906479
19	HAM-012	Ol	2	r	1	HAM012-ol2r	39.44	0.04		0.03	9.2	0.16	0.38	50.28	0.08			99.61	0.972913				0.189799	0.000585104	0.00074233	0.00334305	1.84902	0.00211446			0.00754055	3.02605	0.906907
20	HAM-012	Ol	3	c	1	HAM012-ol3c	39.19	0.01	0.02	0.03	9.32	0.12	0.44	50.37	0.08			99.58	0.968303	0.000582401			0.192584	0.000586047	0.000185882	0.00251132	1.85531	0.00211787			0.00874523	3.03093	0.90596
21	HAM-012	Ol	3	r	1	HAM012-ol3r	39.53	0.01		0.04	9.25	0.15	0.42	50.36	0.07			99.83	0.973207				0.190453	0.000778598	0.000185216	0.00312792	1.8483	0.0018465			0.00831783	3.02622	0.906584
22	SOU-002	Ol	1	c	1	SOU002-ol1c	39.98			0.01	10.29	0.13	0.43	49.79	0.07			100.7	0.9791				0.21075	0.000193624		0.00269658	1.81775	0.00183677			0.00847101	3.0208	0.896106
23	SOU-002	Ol	1	r	1	SOU002-ol1r	40.51			0.03	10.44	0.13	0.42	49.24	0.08			100.85	0.989705				0.21331	0.000579482		0.00269012	1.79337	0.00209415			0.0082542	3.01001	0.8937
24	SOU-002	Ol	2	c	1	SOU002-ol2c	39.72			0.01	10.4	0.09	0.42	49.8	0.07			100.51	0.975451				0.213598	0.000194165		0.00187208	1.8232	0.0018419			0.00829712	3.02445	0.89513
25	SOU-002	Ol	2	r	1	SOU002-ol2r	40.58	0.03	0.02		10.37	0.14	0.4	49.54	0.04			101.12	0.988258	0.000574042			0.211205		0.000549642	0.00288783	1.79855	0.00104374			0.00783611	3.01091	0.89491
26	HAM-018	Ol	1	c	1	HAM018-ol1c	37.92	0.02	0.02	0.06	13.19	0.31	0.38	45.4	0.07			97.37	0.976493	0.000606997			0.284062	0.00122159	0.000387463	0.00676157	1.74287	0.0019314			0.00787166	3.02221	0.859856
27	HAM-018	Ol	1	r	1	HAM018-ol1r	38.7	0.01	0.01	0.02	13.64	0.33	0.36	46.53	0.08			99.68	0.974297	0.000296713			0.287186	0.000398094	0.0001894	0.00703688	1.74631	0.00215796			0.00729063	3.02517	0.858773
28	HAM-018	Ol	2	c	1	HAM018-ol2c	39.02	0.01		0.03	13.01	0.26	0.37	46.5	0.08			99.28	0.982283				0.273902	0.000597098	0.000189387	0.00554381	1.74506	0.00215781			0.00749262	3.01723	0.864335
29	HAM-018	Ol	2	r	1	HAM018-ol2r	39.16	0.01		0.05	13.25	0.19	0.34	46.85	0.12			99.97	0.97973				0.277235	0.000989028	0.000188219	0.00402627	1.74736	0.00321676			0.00684266	3.01959	0.863066
30	HAM-018	Ol	3	c	1	HAM018-ol3c	39.77			0.05	13.58	0.25	0.42	47.04	0.07			101.18	0.983758				0.280931	0.000977862		0.00523791	1.73464	0.00185526			0.00835726	3.01575	0.860619
31	HAM-018	Ol	3	r	1	HAM018-ol3r	40.03	0.01		0.05	13.88	0.28	0.39	47.15	0.1			101.89	0.984204				0.285402	0.000971951	0.000184969	0.005831	1.72818	0.00263435			0.00771341	3.01513	0.858262
32	HAM-018	Ol	4	c	1	HAM018-ol4c	39.31	0.01		0.03	12.98	0.25	0.42	46.73	0.08			99.81	0.983828				0.271681	0.000593625	0.000188285	0.00529958	1.74349	0.00214526			0.00845567	3.01569	0.865183
33	DZ-009	Ol	1	c	1	DZ009-ol1c	40.61	0.02	0.04	0.03	9.04	0.19	0.45	50.37	0.03			100.78	0.987109	0.0011459			0.183767	0.000576538	0.000365731	0.00391175	1.82521	0.000781315			0.00879887	3.01166	0.908527
34	DZ-009	Ol	1	r	1	DZ009-ol1r	39.12				9.69	0.09	0.41	50.51	0.06			99.88	0.965255				0.199956			0.00188092	1.85793	0.00158624			0.00813784	3.03475	0.902834
35	DZ-009	Ol	3	r	1	DZ009-opx2r	39.47	0.02	0.02	0.04	9.23	0.17		50.52	0.15		0.02	99.64	0.97215	0.000580567			0.190124	0.000778935	0.000370592	0.00354651	1.85498	0.0039585		0.000628427		3.02711	0.907035
36	DZ-009	Ol	2	c	1	DZ009-ol2c	40.24	0.01		0.02	9.35	0.09	0.33	50.45	0.05			100.54	0.981808				0.190787	0.00038581	0.000183556	0.00185993	1.83501	0.00130711			0.00647686	3.01782	0.905821
37	DZ-009	Ol	2	r	1	DZ009-ol2r	40.43		0.02	0.06	9.42	0.12	0.39	51.05	0.11			101.6	0.977271	0.000569767			0.190428	0.00114667		0.00245685	1.83957	0.0028489			0.0075833	3.02187	0.906193
38	GU-001	Ol	1	c	1	GU001-ol1c	38.86			0.02	9.54	0.07	0.4	50.84	0.03			99.76	0.959946				0.197088	0.000390615		0.00146463	1.87223	0.000794033			0.00794852	3.03986	0.904757
39	GU-001	Ol	1	r	1	GU001-ol1r	39.94	0.01		0.02	9.28	0.15	0.44	50.97	0.04			100.85	0.973032				0.189075	0.000385233	0.000183282	0.00309525	1.85115	0.00104412			0.00862292	3.02659	0.907326
40	GU-001	Ol	2	c	1	GU001-ol2c	39.93		0.02	0.04	9.2	0.15	0.4	50.84	0.07			100.65	0.974193	0.000575084			0.187716	0.000771579		0.00309972	1.8491	0.00182986			0.00785033	3.02513	0.907838
41	GU-001	Ol	2	r	1	GU001-ol2r	39.59		0.01	0.02	9.5	0.09	0.38	50.47	0.05			100.11	0.972485	0.000289503			0.195159	0.00038842		0.00187251	1.84816	0.00131595			0.00750867	3.02718	0.904489
42	GU-001	Ol	3	c	1	GU001-ol3c	40.34			0.03	9.5	0.19	0.44	50.96	0.06			101.52	0.976702				0.192361	0.000574278		0.00389642	1.83935	0.00155651			0.00856961	3.02301	0.90532
43	GU-001	Ol	3	r	1	GU001-ol3r	39.89			0.04	9.39	0.2	0.38	51.06	0.08			101.04	0.970798				0.191117	0.000769662		0.00412269	1.85248	0.00208607			0.00743928	3.02882	0.90648
44	SOU-003	Ol	1	c	1	SOU003-ol1c	38.9	0.03	0.02	0.02	10.57	0.24	0.35	49.79	0.08			100	0.963231	0.000583669			0.218889	0.000391549	0.000558859	0.00503359	1.83794	0.00212248			0.00697158	3.03572	0.893579
45	SOU-003	Ol	1	r	1	SOU003-ol1r	39.22	0.03		0.03	10.43	0.24	0.35	49.48	0.11			99.89	0.970738				0.215897	0.000587071	0.000558619	0.00503142	1.82571	0.00291716			0.00696858	3.02841	0.894252
46	SOU-003	Ol	2	c	1	SOU003-ol2c	39.03	0.03	0.04	0.02	10.27	0.13	0.34	49.58	0.09			99.53	0.968603	0.00116994			0.21315	0.000392421	0.000560104	0.0027326	1.83427	0.00239311			0.00678748	3.03006	0.895893
47	SOU-003	Ol	2	r	1	SOU003-ol2r	39.82	0.01	0.01	0.02	10.59	0.14	0.3	49.58	0.12			100.59	0.977457	0.000289302			0.2174	0.000388151	0.00018467	0.00291078	1.81431	0.0031561			0.00592379	3.02202	0.892996
48	DZ-002	Ol	1	r	1	DZ002_ol2r	41.4062	0.0012	0.0139	0.0433	9.0956	0.1467	0.3737	50.3598	0.1263	0.0022	0.0129	101.582	0.996887	0.000394413			0.183139	0.000824221	2.17351e-05	0.00299155	1.80748	0.00325805	0.000102695	0.000396213	0.00723746	3.00273	0.907999
49	HAM-005b	Ol	1	c	1	HAM005b_ol1c	41.3809		0.0026	0.0209	8.4893	0.1246	0.3552	50.8473	0.0761	0.0143	0.0246	101.336	0.995963	7.37518e-05			0.170877	0.000397708		0.00254008	1.8244	0.00196246	0.000667308	0.00075533	0.00687699	3.00451	0.914359
50	HAM-005b	Ol	2	c	1	HAM005b_ol2c	41.1251			0.0147	9.1093	0.1665	0.4074	50.1868	0.0799		0.0068	101.096	0.995397				0.184392	0.000281308		0.00341341	1.81087	0.00207209		0.00020997	0.00793218	3.00457	0.907585
51	HAM-005b	Ol	2	r	1	HAM005b_ol2r	41.4466	0.004	0.0063	0.0298	9.2128	0.1661	0.3523	49.7984	0.0821		0.0094	101.108	1.0023	0.000179558			0.186324	0.00056977	7.27727e-05	0.00340223	1.79528	0.00212728		0.000289998	0.00685336	2.9974	0.905973
52	HAM-005b	Ol	4	c	1	HAM005b_cpx2c	41.2745	0.0078		0.0192	8.8187	0.1798	0.3797	50.5635	0.0842	0.0135	0.0057	101.347	0.995157				0.177821	0.000366004	0.000141483	0.00367185	1.81742	0.00217518	0.000631088	0.000175325	0.00736432	3.00492	0.910878
53	HAM-005b	Ol	4	r	1	HAM005b_cpx2r	41.143	0.0016	0.0043	0.0247	8.8671	0.1437	0.3888	50.9713	0.0739	0.0075	0.0111	101.637	0.989877	0.00012193			0.178416	0.000469847	2.89604e-05	0.00292838	1.82818	0.00190503	0.000349859	0.000340696	0.00752478	3.01014	0.911085
54	HAM-005b	Ol	3	c	1	HAM005b_ol3c	40.8078	0.0043	0.0035	0.0143	11.3106	0.2553	0.3186	48.7207	0.0763	0.0104	0.01	101.532	0.993458	0.000100422			0.230282	0.000275243	7.87544e-05	0.00526432	1.76819	0.00199023	0.000490892	0.000310574	0.00623928	3.00668	0.884771
55	DZ-007	Ol	1	c	1	DZ007_ol1c	40.8244		0.0163		9.2148	0.1419	0.3757	49.3202	0.0924	0.0083	0.0081	100.002	0.999108	0.000470149			0.188602			0.00294144	1.79939	0.00242291	0.000393838	0.000252893	0.00739633	3.00098	0.905129
56	DZ-007	Ol	1	r	1	DZ007_ol1r	41.0795		0.012	0.0106	9.2113	0.1585	0.3632	49.2257	0.1226	0.0047	0.0093	100.197	1.00287	0.000345267			0.188064	0.000204597		0.00327742	1.79151	0.00320687	0.000222465	0.00028964	0.00713257	2.99712	0.904997
57	DZ-007	Ol	2	c	1	DZ007_ol2c	40.667		0.016	0.0021	9.2623	0.126	0.3564	48.8425	0.1152	0.011	0.0114	99.4099	1.00129	0.000464295			0.190724	4.08801e-05		0.00262769	1.79277	0.00303909	0.000525119	0.000358081	0.00705892	2.9989	0.903844
58	DZ-007	Ol	2	r	1	DZ007_ol2r	40.6004		0.0187	0.0017	9.3594	0.1536	0.3464	48.8764	0.1383	0.0017	0.0108	99.5074	0.999445	0.000542533			0.192684	3.30866e-05		0.00320262	1.79364	0.00364774	8.1138e-05	0.000339165	0.00685944	3.00048	0.902995
59	DZ-007	Ol	3	c	1	DZ007_ol3c	40.5128		0.0115	0.0123	10.0521	0.2101	0.3469	48.3045	0.0965	0.0085	0.0116	99.5668	0.999984	0.000334545			0.207504	0.000240038		0.00439251	1.77745	0.00255212	0.000406787	0.000365273	0.00688791	3.00011	0.895462
60	DZ-007	Ol	3	r	1	DZ007_ol3r	40.4756	0.004	0.0149	0.0181	10.1485	0.2116	0.3467	48.4502	0.1352	0.0084	0.0101	99.8233	0.997319	0.000432696			0.209127	0.00035261	7.41482e-05	0.00441613	1.77969	0.00356936	0.000401298	0.000317483	0.0068719	3.00257	0.894849
61	HAM-017	Ol	2	c	1	HAM017_cpx1c	40.8355			0.0312	9.2393	0.1218	0.3397	49.7168	0.0572	0.005	0.0129	100.359	0.995978				0.18846	0.000601646		0.0025162	1.80769	0.00149479	0.000236444	0.000401384	0.00666484	3.00404	0.905588
62	HAM-017	Ol	2	r	1	HAM017_cpx1r	40.9866	0.002	0.1834	0.0295	9.2055	0.141	0.3586	48.0682	0.1345	0.0193	0.013	99.1416	1.01032	0.00532811			0.189773	0.00057493	3.70893e-05	0.0029439	1.76638	0.00355233	0.000922406	0.000408809	0.00711067	2.98735	0.902987
63	HAM-017	Ol	1	c	1	HAM017_ol1c	40.8185		0.0032	0.0137	9.116	0.1381	0.3208	49.7026	0.0638	0.0101	0.0144	100.201	0.996546	9.20759e-05			0.186128	0.000264445		0.00285575	1.80896	0.00166891	0.000478089	0.000448499	0.00630024	3.00374	0.906706
64	HAM-017	Ol	1	r	1	HAM017_ol1r	41.1419	0.0039		0.0337	8.8429	0.1441	0.3347	50.245	0.1129	0.0018	0.0159	100.877	0.996458				0.179117	0.000645326	7.10623e-05	0.00295613	1.81416	0.00292983	8.45267e-05	0.000491281	0.00652098	3.00344	0.910139
65	HAM-017	Ol	3	c	1	HAM017_ol3c	40.9972	0.0065	0.0008	0.0075	9.2265	0.1381	0.362	49.6975	0.066	0.0094	0.0089	100.52	0.998036	2.29529e-05			0.187844	0.000144354	0.000119043	0.00284755	1.80358	0.00172151	0.000443677	0.000276401	0.00708896	3.00212	0.905674
66	HAM-017	Ol	3	r	1	HAM017_ol3r	41.1267	0.0088	0.004	0.0316	9.2325	0.1293	0.3365	49.9049	0.0548	0.0057	0.0121	100.847	0.997731	0.000114368			0.187317	0.00060611	0.00016061	0.00265689	1.80485	0.00142444	0.000268109	0.000374484	0.00656685	3.00207	0.905973
67	HAM-005b	Ol	1	c	1	HAM005b_ol1c	41.3809		0.0026	0.0209	8.4893	0.1246	0.3552	50.8473	0.0761	0.0143	0.0246	101.336	0.995963	7.37518e-05			0.170877	0.000397708		0.00254008	1.8244	0.00196246	0.000667308	0.00075533	0.00687699	3.00451	0.914359
68	HAM-005b	Ol	2	c	1	HAM005b_ol2c	41.1251			0.0147	9.1093	0.1665	0.4074	50.1868	0.0799		0.0068	101.096	0.995397				0.184392	0.000281308		0.00341341	1.81087	0.00207209		0.00020997	0.00793218	3.00457	0.907585
69	HAM-005b	Ol	2	r	1	HAM005b_ol2r	41.4466	0.004	0.0063	0.0298	9.2128	0.1661	0.3523	49.7984	0.0821		0.0094	101.108	1.0023	0.000179558			0.186324	0.00056977	7.27727e-05	0.00340223	1.79528	0.00212728		0.000289998	0.00685336	2.9974	0.905973
70	HAM-005b	Ol	4	c	1	HAM005b_cpx2c	41.2745	0.0078		0.0192	8.8187	0.1798	0.3797	50.5635	0.0842	0.0135	0.0057	101.347	0.995157				0.177821	0.000366004	0.000141483	0.00367185	1.81742	0.00217518	0.000631088	0.000175325	0.00736432	3.00492	0.910878
71	HAM-005b	Ol	4	r	1	HAM005b_cpx2r	41.143	0.0016	0.0043	0.0247	8.8671	0.1437	0.3888	50.9713	0.0739	0.0075	0.0111	101.637	0.989877	0.00012193			0.178416	0.000469847	2.89604e-05	0.00292838	1.82818	0.00190503	0.000349859	0.000340696	0.00752478	3.01014	0.911085
72	HAM-005b	Ol	3	c	1	HAM005b_ol3c	40.8078	0.0043	0.0035	0.0143	11.3106	0.2553	0.3186	48.7207	0.0763	0.0104	0.01	101.532	0.993458	0.000100422			0.230282	0.000275243	7.87544e-05	0.00526432	1.76819	0.00199023	0.000490892	0.000310574	0.00623928	3.00668	0.884771
73	DZ-003	Opx	1	c	1	DZ-3-opx1-c	56.01	0.02	2.87	0.84	6.09	0.17		34.67	1	0.1	0.02	101.79	1.90701	0.115166	0.0929852	0.0221813	0.17341	0.0226122	0.000512293	0.00490256	1.75975	0.0364806	0.00660139	0.000868714		4.02732	0.910297		999.072	1014.44	1050.29	1067.49
74	DZ-003	Opx	2	c	1	DZ-3-opx2-c	56.02	0.17	2.38	0.6	5.9	0.18		34.24	1.14	0.11	0.01	100.75	1.92421	0.0963477	0.0757929	0.0205548	0.169484	0.0162943	0.00439297	0.00523681	1.75328	0.0419553	0.00732569	0.000438195		4.01896	0.911854		1034.55	1050.34	1087.2	955.312
75	DZ-003	Opx	2	r	1	DZ-3-opx2-r	55.23	0.17	2.25	0.71	5.99	0.18		34.26	1.22	0.08	0.02	100.11	1.91363	0.0918799	0.0863722	0.00550771	0.173571	0.0194498	0.0044313	0.00528251	1.76961	0.0452914	0.00537427	0.000884038		4.02941	0.910677		1054.81	1070.85	1108.28	991.076
76	DZ-003	Opx	3	c	1	DZ-3-opx3-c	55.59	0.04	2.82	0.75	5.95	0.22		34.48	1	0.09		100.94	1.90771	0.114057	0.0922868	0.02177	0.170766	0.0203494	0.00103271	0.00639476	1.76397	0.0367697	0.00598833			4.02705	0.911737		1001.02	1016.41	1052.32	1034.1
77	HAM-001	Opx	1	c	1	HAM-1-opx1-c	55.3	0.08	3.5	0.55	6.12	0.14		33.86	0.96	0.05		100.56	1.90305	0.141955	0.096945	0.0450098	0.176135	0.0149646	0.00207117	0.00408075	1.73709	0.0353973	0.00333613			4.01808	0.907938		991.674	1006.95	1042.6	985.684
78	HAM-001	Opx	1	r	1	HAM-1-opx1-r2	55.12	0.12	3.69	0.7	5.89	0.22		33.91	1.06	0.08	0.02	100.81	1.89346	0.149393	0.106538	0.0428552	0.169212	0.0190117	0.00310119	0.00640111	1.73654	0.0390145	0.00532825	0.000876468		4.02234	0.91121		1015.87	1031.44	1067.77	1047.95
79	HAM-001	Opx	2	c	1	HAM-1-opx2-c	55.61	0.13	3.7	0.51	5.98	0.11		34.05	0.87	0.11	0.01	101.08	1.90161	0.149117	0.098386	0.050731	0.171017	0.0137884	0.00334436	0.00318601	1.73578	0.0318759	0.00729305	0.000436243		4.01745	0.910312		966.615	981.59	1016.53	978.777
80	HAM-001	Opx	2	r	1	HAM-1-opx2-r	55.24	0.11	3.7	0.57	6.23	0.2		33.61	1.06	0.07		100.79	1.89882	0.149895	0.101178	0.0487173	0.179096	0.015491	0.00284461	0.00582299	1.7223	0.03904	0.00466526			4.01797	0.905808		1016.03	1031.6	1067.94	1000.85
81	HAM-012	Opx	1	c	1	HAM012-opx1-c	53.73	0.13	3.56	0.49	6.21	0.13		34.24	0.64	0.06		99.19	1.87844	0.146685	0.121564	0.0251208	0.181568	0.0135441	0.00341919	0.00384954	1.78452	0.0239736	0.00406703			4.04006	0.90765		903.246	917.455	950.61	969.419
82	HAM-012	Opx	1	r	1	HAM012-opx1-r	54.58	0.11	2.74	0.38	6.32	0.14		34.58	0.65	0.13		99.63	1.89957	0.11239	0.100433	0.0119566	0.183953	0.0104563	0.00288014	0.004127	1.79413	0.0242386	0.00877225			4.04052	0.907005		905.571	919.808	953.029	898.017
83	HAM-012	Opx	2	c	1	HAM012-opx2-c	54.76	0.1	3.13	0.46	6.26	0.18		34.08	0.61	0.05		99.63	1.9031	0.128203	0.0968976	0.0313056	0.181945	0.0126395	0.00261456	0.00529855	1.76566	0.0227144	0.00336911			4.02555	0.90658		891.968	906.041	938.879	938.877
84	HAM-012	Opx	2	r	1	HAM012-opx2-r	54.56	0.14	2.87	0.41	6.06	0.23		34.4	0.73	0.07	0.01	99.48	1.90003	0.117794	0.0999713	0.0178228	0.176493	0.0112887	0.00366787	0.00678421	1.78588	0.0272384	0.0047264	0.000444267		4.03435	0.910062		930.825	945.367	979.3	909.013
85	HAM-012	Opx	3	r	1	HAM012-opx3r	55.62	0.1	2.71	0.44	6.19	0.23		34.86	0.77	0.02		100.94	1.9082	0.109577	0.091798	0.0177787	0.177604	0.011935	0.00258103	0.00668354	1.78291	0.0283046	0.00133036			4.02913	0.90941		939.373	954.019	988.192	907.871
86	HAM-012	Opx	3	c	1	HAM012-opx3c	55.66	0.13	2.31	0.52	5.97	0.14		34.45	0.95	0.06	0.02	100.21	1.92182	0.0940019	0.0781823	0.0158196	0.17239	0.0141954	0.00337686	0.00409433	1.77324	0.0351452	0.00401668	0.000880963		4.02316	0.911396		989.933	1005.19	1040.79	923.23
87	HAM-012	Opx	4	c	1	HAM012-opx4c	54.57	0.11	3.28	0.46	6.14	0.13		34.24	0.56	0.02	0.01	99.52	1.89738	0.13441	0.102619	0.0317906	0.178541	0.0126454	0.00287736	0.00382851	1.77477	0.0208623	0.00134827	0.000443567		4.02711	0.908596		874.621	888.484	920.833	942.778
88	HAM-012	Opx	4	r	1	HAM012-opx4r	55.11	0.12	2.91	0.41	6.29	0.13		34.54	0.69	0.08		100.28	1.90352	0.118461	0.0964779	0.0219833	0.181696	0.0111966	0.00311824	0.00380326	1.77852	0.0255358	0.00535753			4.03121	0.907308		916.723	931.095	964.63	910.274
89	SOU-002	Opx	1	c	1	SOU002-opx1c	53.85	0.16	5.01	0.48	6.51	0.12		33.2	0.68	0.12		100.13	1.86492	0.204488	0.135078	0.0694101	0.188549	0.0131429	0.00416865	0.00351999	1.71404	0.0252323	0.00805755			4.02612	0.900899		914.147	928.488	961.95	1026.96
90	SOU-002	Opx	1	r	1	SOU002-opx1r	55.35	0.09	4.14	0.36	6.54	0.24		33.61	0.74	0.06	0.01	101.14	1.89537	0.167084	0.104625	0.0624584	0.187294	0.00974664	0.00231857	0.00696104	1.71575	0.0271508	0.0039836	0.000436854		4.0161	0.901582		930.113	944.647	978.559	941.726
91	SOU-002	Opx	2	c	1	SOU002-opx2c	54.99	0.16	4.37	0.36	6.78	0.16		33.37	0.65	0.13		100.97	1.88809	0.176838	0.111911	0.0649267	0.194687	0.00977273	0.00413294	0.00465312	1.70806	0.0239125	0.00865424			4.0188	0.897681		902.708	916.911	950.051	953.351
92	SOU-002	Opx	2	r	1	SOU002-opx2r	54.72	0.09	3.84	0.32	6.66	0.14		33.43	0.69	0.08		99.97	1.89687	0.156884	0.103128	0.053756	0.193079	0.00877035	0.00234712	0.0041106	1.72757	0.025628	0.00537686			4.02064	0.899472		917.501	931.883	965.439	919.309
93	SOU-002	Opx	3	c	1	SOU002-opx3c	53.5	0.23	5.95	0.58	6.26	0.14		31.24	2.54	0.1		100.54	1.85232	0.242792	0.147682	0.0951096	0.181261	0.0158769	0.00599087	0.00410559	1.61243	0.0942255	0.00671287			4.01571	0.898945		1286.16	1304.99	1348.94	1098.61
94	SOU-002	Opx	3	r	1	SOU002-opx3r	55.08	0.1	3.91	0.31	6.67	0.17		33.62	0.68	0.04		100.58	1.89714	0.158722	0.102864	0.055858	0.192131	0.00844192	0.00259122	0.00495951	1.72628	0.025095	0.00267123			4.01803	0.899849		912.974	927.301	960.73	913.465
95	HAM-018	Opx	1	c	1	HAM018-opx1c	53.91	0.12	4.44	0.32	8.81	0.23		31.69	0.72	0.12	0.03	100.39	1.88122	0.182604	0.118776	0.0638279	0.257108	0.00882868	0.0031503	0.00679805	1.64855	0.0269201	0.00811894	0.00133552		4.02464	0.865082		928.232	942.743	976.602	948.135
96	HAM-018	Opx	1	r	1	HAM018-opx1r	54.51	0.1	3.87	0.24	8.84	0.21		32.08	0.87	0.07	0.02	100.81	1.89376	0.158458	0.10624	0.0522188	0.256844	0.00659227	0.00261366	0.0061795	1.66147	0.0323848	0.00471513	0.000886416		4.0239	0.866109		970.339	985.359	1020.4	890.338
97	HAM-018	Opx	2	c	1	HAM018-opx2c	54.42	0.11	3.91	0.22	8.71	0.27		32.06	0.64	0.12	0.01	100.47	1.89513	0.160477	0.104867	0.0556101	0.253669	0.00605729	0.00288187	0.00796398	1.66438	0.02388	0.00810232	0.000444262		4.02299	0.867747		902.421	916.621	949.752	888.209
98	HAM-018	Opx	2	r	1	HAM018-opx2r	54.54	0.04	3.66	0.23	8.46	0.18		32.19	0.73	0.07		100.1	1.90313	0.150518	0.0968736	0.0536447	0.246883	0.00634534	0.00105006	0.00531999	1.67449	0.0272928	0.00473584			4.01976	0.871507		931.266	945.814	979.759	882.005
99	HAM-018	Opx	3	c	1	HAM018-opx3c	52.77	0.17	4.53	0.48	8.52	0.22		31.88	0.74	0.08		99.39	1.86158	0.188343	0.138417	0.0499254	0.251364	0.0133879	0.00451174	0.0065736	1.67657	0.0279705	0.00547182			4.03578	0.86962		936.717	951.33	985.429	1009.99
100	HAM-018	Opx	3	r	1	HAM018-opx3r	54.82	0.15	4.2	0.33	8.91	0.24		31.94	0.72	0.04		101.35	1.89293	0.170923	0.107067	0.0638567	0.257301	0.00900918	0.00389662	0.00701929	1.64414	0.026638	0.00267795			4.01454	0.864681		925.918	940.401	974.195	931.134
101	HAM-018	Opx	4	c	1	HAM018-opx4c	54.16	0.09	3.77	0.21	8.84	0.17		32.02	0.58	0.02		99.86	1.89723	0.155646	0.10277	0.0528757	0.258977	0.00581615	0.00237183	0.00504401	1.67213	0.0217692	0.00135837			4.02035	0.865892		883.234	897.202	929.793	873.937
102	HAM-018	Opx	5	c	1	HAM018-opx5c	53.73	0.09	3.85	0.23	8.7	0.21		32.03	0.69	0.03		99.56	1.88918	0.159541	0.110823	0.048718	0.255825	0.00639379	0.00238067	0.00625404	1.67889	0.0259943	0.00204514			4.0265	0.867771		920.578	934.996	968.64	886.49
103	HAM-018	Opx	5	r	1	HAM018-opx5r	54.68	0.06	3.54	0.18	9.07	0.19		32.41	0.76	0.06	0.01	100.96	1.89792	0.144813	0.102078	0.0427358	0.263285	0.00493966	0.00156676	0.00558585	1.67702	0.0282642	0.00403783	0.000442801		4.02787	0.864307		939.053	953.695	987.859	855.287
104	DZ-009	Opx	1	c	1	DZ009-opx1c	53.13	0.13	4.45	0.67	6.04	0.18		33.4	0.61	0.09		98.7	1.86581	0.184181	0.134188	0.0499924	0.177392	0.0186028	0.00343456	0.00535409	1.74857	0.0229526	0.00612798			4.03243	0.907895		894.131	908.231	941.129	1078.9
105	DZ-009	Opx	1	r	1	DZ009-opx1r	54.16	0.07	3.56	0.41	5.97	0.23		34.43	0.61	0.09		99.53	1.88426	0.145971	0.115743	0.0302286	0.173702	0.0112777	0.00183214	0.00677758	1.78569	0.0227386	0.00607087			4.03832	0.911349		892.189	906.265	939.108	943.522
106	DZ-009	Opx	4	l	1	DZ009-lam-in-cpx1	55.29	0.08	5.29	0.78	6.03	0.18		33.5	0.5	0.08		101.73	1.87714	0.211671	0.122863	0.0888072	0.171212	0.0209372	0.00204333	0.00517615	1.69552	0.0181883	0.00526606			4.00715	0.908282		847.709	861.248	892.838	1141.08
107	DZ-009	Opx	2	c	1	DZ009-opx2c	54.45	0.13	4.13	0.53	6.15	0.11		34.06	0.59	0.03		100.18	1.88085	0.168136	0.119155	0.0489812	0.177664	0.0144746	0.0033783	0.00321835	1.75391	0.0218364	0.0020092			4.02548	0.908022		883.863	897.838	930.447	1002.3
108	DZ-009	Opx	3	c	1	DZ009-opx3c	53.55	0.11	4.35	0.66	6.27	0.2		33.55	0.66			99.35	1.8694	0.178973	0.130604	0.0483682	0.183053	0.0182163	0.00288891	0.00591367	1.74599	0.0246865				4.02912	0.905107		909.463	923.748	957.078	1062.99
109	DZ-009	Opx	3	r	1	DZ009-opx3r	55.49	0.08	3.35	0.39	5.86	0.18		34.33	0.54	0.1		100.32	1.90915	0.135839	0.0908514	0.044988	0.168613	0.0106088	0.00207069	0.00524545	1.76079	0.0199064	0.00667071			4.01889	0.912609		865.274	879.025	911.11	924.052
110	GU-001	Opx	1	c	1	GU001-opx1c	53.51	0.15	4.99	0.84	5.75	0.18		33.4	0.97	0.16		99.95	1.85572	0.203955	0.144276	0.0596791	0.166769	0.023032	0.00391354	0.00528733	1.72677	0.0360432	0.0107583			4.03225	0.911927		996.101	1011.43	1047.2	1163.1
111	GU-001	Opx	1	r	1	GU001-opx1r	54.73	0.09	3.01	0.34	6.11	0.13		34.56	0.51	0.05		99.53	1.90194	0.12328	0.0980627	0.0252174	0.177574	0.00934167	0.00235295	0.00382648	1.79041	0.0189895	0.0033689			4.03108	0.909769		856.03	869.669	901.494	889.817
112	GU-001	Opx	2	c	1	GU001-opx2c	55.56	0.13	4.17	0.68	6.17	0.18		34.12	0.57	0.09		101.67	1.89012	0.167194	0.109875	0.0573184	0.175542	0.0182899	0.00332715	0.00518664	1.7304	0.0207767	0.00593632			4.01677	0.907897		873.795	887.649	919.974	1056.97
113	GU-001	Opx	2	r	1	GU001-opx2r	55.25	0.07	2.81	0.38	6.03	0.09		35.16	0.55	0.04	0.01	100.39	1.90307	0.114073	0.0969333	0.01714	0.173703	0.0103486	0.00181393	0.00262573	1.80542	0.0202982	0.00267134	0.00043942		4.03446	0.912233		869.14	882.937	915.131	894.178
114	DZ-002	Opx	1	c	1	DZ002_opx1c	56.8457	0.0259	2.9026	0.7362	5.2468	0.1537	0.0978	33.2858	1.5117	0.2432	0.0243	101.074	1.93986	0.116739	0.0601372	0.0566019	0.149739	0.019863	0.000664926	0.00444255	1.69333	0.0552729	0.016091	0.00105788	0.00268469	3.99975	0.918755		1110.63	1127.34	1166.34	1041.66
115	DZ-002	Opx	1	r	1	DZ002_opx1r	57.208	0.0381	2.5627	0.6534	5.671	0.1373	0.0994	34.1294	1.1732	0.1397	0.0335	101.846	1.93914	0.102378	0.0608592	0.0415187	0.160761	0.0175108	0.000971578	0.00394193	1.72461	0.0426086	0.00918112	0.00144862	0.00271032	4.00526	0.914732		1038.59	1054.44	1091.41	987.093
116	DZ-002	Opx	2	c	1	DZ002_opx2c	56.7998	0.0279	2.7015	0.6427	5.8071	0.1389	0.12	34.4731	0.8991	0.1003	0.0198	101.73	1.92852	0.108103	0.0714756	0.0366277	0.164894	0.0172529	0.000712661	0.00399453	1.74489	0.0327084	0.00660277	0.000857634	0.00327749	4.01182	0.913658		972.688	987.736	1022.85	987.441
117	DZ-002	Opx	2	r	1	DZ002_opx2r	56.6153	0.0255	2.6725	0.682	5.7627	0.1474	0.0972	34.3035	0.9131	0.0994	0.0127	101.331	1.92956	0.107349	0.0704375	0.0369116	0.164255	0.0183774	0.000653831	0.00425508	1.7429	0.0333439	0.00656838	0.000552188	0.00266485	4.01048	0.913874		977.26	992.363	1027.6	1001.9
118	DZ-002	Opx	3	c	1	DZ002_opx3c	56.6898	0.0963	2.3218	0.5756	6.0327	0.1575	0.0982	33.8062	1.1602	0.0966	0.014	101.049	1.94019	0.0936526	0.0598094	0.0338433	0.172671	0.0155753	0.00247951	0.00456568	1.72482	0.0425447	0.00641008	0.00061126	0.00270354	4.00623	0.909		1038.2	1054.04	1091	945.843
119	DZ-002	Opx	3	r	1	DZ002_opx3r	56.5281	0.1287	2.113	0.7447	6.1544	0.1507	0.0911	33.8295	1.2309	0.112	0.0082	101.091	1.93721	0.085343	0.0627886	0.0225544	0.176387	0.0201776	0.00331811	0.00437433	1.72829	0.0451969	0.00744179	0.000358497	0.00251138	4.01061	0.907393		1054.25	1070.28	1107.7	998.547
120	HAM-005b	Opx	1	c	1	HAM005b_opx1c	55.7158	0.0293	4.0891	0.6227	5.4163	0.1157	0.0701	34.2264	0.7468	0.0819	0.0141	101.128	1.89898	0.164258	0.101021	0.0632367	0.154388	0.0167801	0.000751293	0.00334011	1.73905	0.0272721	0.00541218	0.000613083	0.00192195	4.01276	0.918462		931.099	945.644	979.584	1038.37
121	HAM-005b	Opx	1	r	1	HAM005b_opx1r	56.6053	0.0257	3.5882	0.5389	5.5904	0.1405	0.0755	34.4156	0.6327	0.0784	0.0131	101.704	1.91715	0.143229	0.082851	0.0603781	0.158347	0.0144305	0.000654835	0.00403051	1.73765	0.0229599	0.00514827	0.000566016	0.00205697	4.00622	0.916484		894.198	908.298	941.198	984.664
122	HAM-005b	Opx	2	c	1	HAM005b_opx2c	55.6479	0.0275	3.9229	0.5651	5.5225	0.1251	0.0894	34.0585	0.7578	0.0794	0.0139	100.81	1.90347	0.158147	0.0965296	0.0616172	0.15798	0.0152826	0.000707669	0.00362443	1.73673	0.0277731	0.0052658	0.000606556	0.0024599	4.01204	0.91662		935.138	949.733	983.787	1011.74
123	HAM-005b	Opx	2	r	1	HAM005b_opx2r	56.3054	0.0428	2.8578	0.4179	5.7929	0.1406	0.0924	34.5832	0.8114	0.0623	0.0059	101.113	1.92223	0.114986	0.0777668	0.0372188	0.165394	0.0112798	0.00109926	0.00406562	1.76007	0.02968	0.00412374	0.000256961	0.00253752	4.01573	0.914102		950.107	964.882	999.358	910.696
124	HAM-005b	Opx	3	c	1	HAM005b_opx3c	56.0705	0.0302	3.5551	0.5001	5.6009	0.1469	0.0768	34.2718	0.6519	0.0656	0.0109	100.981	1.91372	0.143005	0.0862755	0.05673	0.159871	0.0134951	0.000775447	0.00424671	1.74378	0.0238396	0.00434106	0.000474603	0.00210857	4.00966	0.916018		902.065	916.26	949.381	970.724
125	HAM-005b	Opx	3	r	1	HAM005b_opx3r	56.1146	0.0212	3.3066	0.448	6.0632	0.1519	0.0889	34.0831	0.6212	0.0617	0.0091	100.97	1.919	0.133271	0.0810045	0.0522664	0.173408	0.012113	0.000545424	0.00439988	1.73758	0.0227616	0.00409101	0.000397007	0.00244558	4.01001	0.909258		892.398	906.476	939.326	942.143
126	DZ-007	Opx	1	c	1	DZ007_opx2c	54.9068	0.0669	4.0147	0.5703	5.8368	0.1334	0.0779	32.8812	0.6407	0.0758	0.0118	99.2163	1.90946	0.164548	0.0905372	0.0740113	0.169757	0.0156806	0.0017503	0.0039294	1.70467	0.0238733	0.00511094	0.000523511	0.00217924	4.00149	0.909435		902.362	916.561	949.691	1021.45
127	DZ-007	Opx	1	r	1	DZ007_opx2r	55.7041	0.0351	2.8778	0.3442	5.9346	0.1823	0.066	33.3536	0.6918	0.0545	0.0116	99.2556	1.93584	0.117869	0.0641629	0.0537057	0.172481	0.0094573	0.000917675	0.00536604	1.72796	0.0257594	0.00367219	0.000514278	0.00184505	4.00168	0.909241		918.608	933.003	966.591	889.04
128	DZ-007	Opx	1	c	2	DZ007_opx2c	54.4267	0.1495	3.7804	0.6613	6.6173	0.2723	0.0647	32.0549	1.1031	0.0788	0.0112	99.2202	1.90509	0.155954	0.0949073	0.0610471	0.19371	0.0183011	0.00393682	0.00807304	1.67266	0.0413706	0.00534783	0.000500127	0.00182176	4.00677	0.89621		1030.9	1046.65	1083.4	1043.49
129	DZ-007	Opx	1	r	2	DZ007_opx2r	54.2269	0.1009	4.1594	0.6256	6.4191	0.2207	0.0711	31.5714	1.815	0.1137	0.0157	99.3395	1.89777	0.17156	0.102226	0.0693346	0.187876	0.0173102	0.00265657	0.00654211	1.64715	0.0680581	0.00771502	0.000700952	0.00200162	4.00934	0.897616		1174.19	1191.67	1232.46	1051.57
130	DZ-007	Opx	2	c	1	DZ007_cpx2c	56.2607	0.0254	1.817	0.2742	5.7976	0.165	0.0798	33.5839	0.7766	0.0779	0.0102	98.8683	1.96111	0.0746461	0.0388916	0.0357545	0.16901	0.00755681	0.000666086	0.00487154	1.74516	0.0290046	0.00526479	0.000453581	0.0022376	3.99998	0.911706		944.876	959.588	993.917	820.475
131	DZ-007	Opx	2	r	1	DZ007_cpx2r	55.858	0.0191	1.878	0.3364	5.9709	0.1754	0.0875	33.8595	0.7764	0.0629	0.0141	99.0382	1.94792	0.0771856	0.0520828	0.0251028	0.174138	0.00927504	0.000501093	0.00518084	1.76025	0.0290097	0.00425287	0.000627282	0.00245457	4.01079	0.909978		944.916	959.629	993.958	845.581
132	DZ-007	Opx	3	c	1	DZ007_opx3c	54.6314	0.0554	4.3675	0.6035	5.9069	0.153	0.0743	32.8166	0.7227	0.0989	0.013	99.4432	1.89788	0.17882	0.102117	0.0767031	0.171615	0.016576	0.0014479	0.00450198	1.69953	0.0269004	0.00666147	0.000576141	0.00207634	4.00659	0.908284		928.07	942.58	976.434	1050.68
133	DZ-007	Opx	3	r	1	DZ007_opx3r	55.7277	0.0256	2.6931	0.3865	6.1177	0.1821	0.0772	33.2794	0.7266	0.0726	0.0084	99.2969	1.93822	0.110393	0.0617789	0.0486139	0.177946	0.0106281	0.000669842	0.00536448	1.72551	0.027077	0.00489571	0.000372709	0.00215989	4.00323	0.906514		929.512	944.039	977.934	898.816
134	HAM-017	Opx	1	c	1	HAM017_opx1c	55.6036	0.1803	3.058	0.6729	5.9224	0.1429	0.1138	33.7332	0.6634	0.0613	0.0211	100.173	1.91825	0.124335	0.0817531	0.0425823	0.170871	0.0183538	0.00467948	0.0041756	1.73487	0.0245217	0.00410024	0.00092863	0.0031581	4.00824	0.910339		908.037	922.304	955.594	1008.34
135	HAM-017	Opx	1	r	1	HAM017_opx1r	56.6997	0.1193	1.9486	0.4017	5.9118	0.133	0.0814	33.9665	0.8287	0.0597	0.0036	100.154	1.95284	0.079098	0.0471551	0.0319429	0.170284	0.0109386	0.0030912	0.00387993	1.744	0.0305814	0.00398665	0.000158179	0.00225524	4.00112	0.911045		956.973	971.831	1006.5	864.322
136	HAM-017	Opx	2	c	1	HAM017_opx3c	55.7773	0.1459	2.6544	0.5554	5.8704	0.1236	0.0654	33.6212	0.6297	0.0776	0.0137	99.5346	1.93367	0.108454	0.0663328	0.0421214	0.1702	0.0152232	0.00380522	0.00362934	1.73758	0.02339	0.00521594	0.000605903	0.00182383	4.0036	0.910786		898.068	912.215	945.224	952.535
137	HAM-017	Opx	2	r	1	HAM017_opx3r	56.8387	0.1043	1.7775	0.4415	5.9086	0.1485	0.0866	34.1014	0.7819	0.0615	0.0079	100.258	1.95572	0.0720822	0.0442788	0.0278034	0.170026	0.0120107	0.0026999	0.00432787	1.74922	0.0288262	0.00410284	0.000346776	0.00239697	4.00176	0.91141		943.481	958.177	992.466	872.39
138	DZ-003	Cpx	1	c	1	DZ-3-cpx1-c	52.72	0.34	3.28	1	3.04	0.13		18.09	20.63	0.79		100.02	1.91215	0.140209	0.0878507	0.0523583	0.0917098	0.0286762	0.00927738	0.0039937	0.978123	0.801713	0.0555546			4.02141	0.914276						0.0553296		0.00977181	0.02856	0.0521462	0.707987	0.146205	0.383211	0.600613	0.0161762	0.616789
139	DZ-003	Cpx	1	r	1	DZ-3-cpx1-r	52.02	0.5	3.75	1.35	3.31	0.1		17.81	20.51	1.08	0.01	100.44	1.88643	0.160272	0.113566	0.046706	0.0994243	0.0387061	0.0136408	0.00307154	0.962817	0.796911	0.075935	0.000462626		4.03767	0.906401						0.0751645		0.0384669	0.0383134	0.0462321	0.665814	0.136009	0.374286	0.635865	-0.0101519	0.625714
140	DZ-003	Cpx	2	c	1	DZ-3-cpx2-c	53.04	0.4	3.38	1.1	2.97	0.13		17.91	20.64	0.95		100.52	1.91375	0.143732	0.0862466	0.0574859	0.089151	0.0313798	0.0108578	0.00397293	0.963356	0.797931	0.0664589			4.02059	0.915296						0.0626748	0.00359318		0.0312896	0.0537275	0.710622	0.138093	0.387762	0.59597	0.0162676	0.612238
141	DZ-003	Cpx	2	r	1	DZ-3-cpx2-r	52.68	0.41	3.62	1.15	3.03	0.08		17.81	20.43	0.99		100.2	1.90706	0.154448	0.0929416	0.0615065	0.0912129	0.0329148	0.0111661	0.00245298	0.961149	0.792428	0.0694865			4.02232	0.913325						0.067828	0.0013576		0.0327723	0.0598826	0.696342	0.141818	0.383747	0.601796	0.0144571	0.616253
142	DZ-003	Cpx	6	l	1	DZ-3-lam-in-opx1c	53.05	0.12	3.82	1.47	3.03	0.11		17.7	20.18	1		100.48	1.91307	0.162354	0.0869343	0.0754199	0.0910053	0.0419118	0.00325556	0.00335987	0.951538	0.77972	0.0699184			4.01613	0.912708						0.0490779	0.0205095		0.0417134	0.0545533	0.679762	0.154384	0.366153	0.607239	0.0266077	0.633847
143	DZ-003	Cpx	3	c	1	DZ-3-cpx3-c	52.37	0.47	3.86	1.3	3.03	0.09		17.6	20.52	0.94		100.18	1.89795	0.164871	0.102055	0.0628161	0.0913515	0.0372494	0.0128144	0.00276267	0.950873	0.796804	0.0660505			4.02072	0.912349						0.0631186	0.00276242		0.0371538	0.0598925	0.697714	0.139359	0.381395	0.600867	0.0177381	0.618605
144	DZ-003	Cpx	3	r	1	DZ-3-cpx3-r	52.69	0.46	3.7	1.46	2.91	0.09		17.35	20.38	1.04		100.08	1.90948	0.158031	0.0905239	0.0675075	0.0878752	0.0418325	0.0125413	0.00276257	0.937333	0.79134	0.0730746			4.01427	0.914286						0.0436272	0.0294852		0.0418542	0.0380573	0.711839	0.135137	0.377537	0.594389	0.0280732	0.622463
145	DZ-003	Cpx	4	c	1	DZ-3-cpx4-c	51.35	0.59	4.2	1.36	3.02	0.08		17.13	20.47	1.2		99.4	1.88036	0.181261	0.119642	0.0616194	0.0916684	0.0393744	0.0162537	0.00248128	0.935117	0.80314	0.0851978			4.03485	0.910723						0.0845167		0.0206974	0.0390596	0.0611268	0.675836	0.118764	0.38324	0.626402	-0.00964171	0.61676
146	DZ-003	Cpx	4	r	1	DZ-3-cpx4-r	51.88	0.61	4.14	1.43	3.08	0.13		17.13	20.49	1.01		99.9	1.88828	0.177591	0.111722	0.0658699	0.0932567	0.0411507	0.0167031	0.0040077	0.929463	0.799063	0.0712745			4.02079	0.908815						0.0635137	0.00775805		0.0411491	0.0581093	0.699774	0.129696	0.381659	0.599169	0.019172	0.618341
147	DZ-003	Cpx	5	c	1	DZ-3-cpx5-c	51.85	0.56	3.91	1.19	3.12	0.06		17.6	20.53	0.99		99.81	1.88865	0.167856	0.111345	0.0565108	0.0943393	0.0342709	0.0153459	0.00185115	0.955708	0.801246	0.0699175			4.02919	0.910157						0.0695008		0.0189869	0.0340666	0.056174	0.687243	0.134029	0.380641	0.61593	0.00342932	0.619359
148	DZ-003	Cpx	5	r	1	DZ-3-cpx5-r	51.54	0.52	4.12	1.22	3.2	0.06		17.21	20.21	0.98	0.01	99.07	1.89038	0.178097	0.109622	0.0684748	0.0975811	0.0353785	0.0143485	0.00186398	0.941009	0.794225	0.0696911	0.00046791		4.02304	0.906045						0.0694702		0.000737394	0.0352663	0.0682578	0.687446	0.138822	0.379662	0.602942	0.0173963	0.620338
149	DZ-003	Cpx	7	c	1
150	DZ-003	Cpx	7	c	2
151	DZ-003	Cpx	7	c	3
152	DZ-003	Cpx	7	c	4
153	DZ-003	Cpx	8	c	1
154	DZ-003	Cpx	8	c	2
155	DZ-003	Cpx	8	c	3
156	DZ-003	Cpx	8	r	1
157	DZ-003	Cpx	8	r	2
158	DZ-003	Cpx	8	r	3
159	DZ-003	Cpx	9	c	1
160	DZ-003	Cpx	9	c	2
161	DZ-003	Cpx	9	c	3
162	DZ-003	Cpx	9	r	1
163	DZ-003	Cpx	9	r	2
164	DZ-003	Cpx	9	r	3
165	DZ-003	Cpx	10	i	1
166	DZ-003	Cpx	10	i	2
167	DZ-003	Cpx	10	i	3
168	DZ-003	Cpx	11	c	1
169	DZ-003	Cpx	11	c	2
170	DZ-003	Cpx	11	c	3
171	DZ-003	Cpx	11	r	1
172	DZ-003	Cpx	11	r	2
173	DZ-003	Cpx	11	r	3
174	HAM-001	Cpx	1	r	1	HAM-1-cpx1-r	51.41	0.35	5.13	1.08	3.21	0.1		16.92	20.41	1.08		99.69	1.87394	0.220385	0.126058	0.0943271	0.0971535	0.0311248	0.00959791	0.00308741	0.919428	0.797122	0.0763272			4.02817	0.904431						0.0757409		0.0095838	0.0308858	0.0936025	0.656927	0.13326	0.36917	0.62326	0.00757079	0.63083
175	HAM-001	Cpx	1	c	1	HAM-1-cpx1-c	51.74	0.37	5.29	1.25	2.85	0.07		16.31	20.83	1.22		99.93	1.87998	0.226537	0.120019	0.106518	0.0861381	0.0359097	0.0101141	0.00215432	0.883466	0.810941	0.0859476			4.02119	0.911162						0.0643288	0.0212372		0.0357503	0.0848078	0.686783	0.107093	0.377231	0.607959	0.0148107	0.622769
176	HAM-001	Cpx	2	c	1	HAM-1-cpx2-c	51.43	0.34	5.62	1.5	2.85	0.05		15.84	20.85	1.16	0.01	99.65	1.87477	0.241448	0.125229	0.116219	0.0865649	0.0432313	0.00932418	0.00154379	0.860787	0.81435	0.0819854	0.00046504		4.01447	0.908624						0.0441379	0.0377192		0.0431636	0.0783181	0.691593	0.105069	0.368442	0.601937	0.0296203	0.631558
177	HAM-001	Cpx	2	r	1	HAM-1-cpx2-r	51.2	0.36	5.21	1.14	3.02	0.13		16.64	20.44	1.07		99.21	1.8745	0.224806	0.125504	0.0993023	0.091901	0.0329985	0.00991556	0.00403128	0.908189	0.801805	0.0759531			4.0241	0.908107						0.0731628	0.00240673		0.0328319	0.0963942	0.66853	0.126674	0.372729	0.614837	0.0124342	0.627271
178	HAM-001	Cpx	3	r	1	HAM-1-cpx3-r	51.15	0.32	5.03	0.98	2.94	0.09		17.12	20.41	0.97		99.01	1.87475	0.217281	0.125247	0.092034	0.0894909	0.0283988	0.00882365	0.002794	0.935429	0.80152	0.0689314			4.02742	0.912685						0.068391		0.0145157	0.0281761	0.0913125	0.661232	0.136373	0.367694	0.628323	0.0039826	0.632306
179	HAM-001	Cpx	3	c	1	HAM-1-cpx3-c	50.92	0.38	5.88	1.36	2.8	0.1		15.92	21.11	1.23		99.7	1.85851	0.252935	0.14149	0.111446	0.0848635	0.0392455	0.0104342	0.00309145	0.86622	0.82554	0.0870419			4.02788	0.910772						0.0842492	0.00217238		0.0389658	0.108479	0.672211	0.0939223	0.380945	0.619048	6.79666e-06	0.619055
180	HAM-001	Cpx	4	i	1	HAM-1-cpx4-in-ol	51.09	0.35	5.51	1.14	2.76	0.03		16.24	21.17	0.99		99.28	1.86931	0.237604	0.130688	0.106915	0.084016	0.0329781	0.00963416	0.000929721	0.88581	0.829927	0.0702308			4.02044	0.91337						0.0620051	0.00788062		0.032816	0.0985092	0.694523	0.104266	0.380132	0.605043	0.0148252	0.619868
181	HAM-001	Cpx	5	c	1
182	HAM-001	Cpx	5	c	2
183	HAM-001	Cpx	5	r	1
184	HAM-001	Cpx	5	r	2
185	HAM-001	Cpx	5	r	3
186	HAM-001	Cpx	6	c	1
187	HAM-001	Cpx	6	c	2
188	HAM-001	Cpx	6	r	1
189	HAM-001	Cpx	6	r	2
190	HAM-001	Cpx	6	r	3
191	HAM-001	Cpx	7	c	1
192	HAM-001	Cpx	7	c	2
193	HAM-001	Cpx	7	r	1
194	HAM-001	Cpx	7	r	2
195	HAM-001	Cpx	7	r	3
196	HAM-001	Cpx	8	c	1
197	HAM-001	Cpx	8	c	2
198	HAM-001	Cpx	8	r	1
199	HAM-001	Cpx	8	r	2
200	HAM-001	Cpx	8	r	3
201	HAM-001	Cpx	9	c	1
202	HAM-001	Cpx	9	c	2
203	HAM-001	Cpx	9	r	1
204	HAM-001	Cpx	9	r	2
205	HAM-001	Cpx	9	r	3
206	HAM-012	Cpx	1	r	1	HAM012-cpx1-r	51.95	0.38	4.5	0.81	2.59	0.04		16.57	22.16	0.92		99.92	1.88995	0.192945	0.110049	0.0828963	0.0783318	0.0232983	0.0104004	0.00123257	0.898662	0.86379	0.0648933			4.0235	0.919824						0.0645104		0.00655902	0.0231609	0.0824072	0.746566	0.0767967	0.407945	0.587582	0.00447261	0.592055
207	HAM-012	Cpx	1	c	1	HAM012-cpx1-c	51.68	0.4	4.71	0.95	2.47	0.12		16.31	22.4	1.08		100.12	1.87991	0.201925	0.120093	0.0818324	0.0745337	0.027322	0.0109465	0.00369727	0.884456	0.873042	0.0761701			4.032	0.922279						0.0755148		0.0206828	0.0270869	0.0811284	0.736633	0.0589547	0.409598	0.605813	-0.0154105	0.590402
208	HAM-012	Cpx	2	c	1	HAM012-cpx2c	50.16	0.4	4.81	1.08	2.39	0.06		16.12	22.23	1.08		98.33	1.86178	0.210412	0.138225	0.0721874	0.0733655	0.0316934	0.0111694	0.00188628	0.891956	0.884061	0.0777214			4.04404	0.923999						0.0765356		0.0545307	0.0312099	0.0710861	0.713747	0.0528903	0.401263	0.64171	-0.0429732	0.598737
209	HAM-012	Cpx	2	r	1	HAM012-cpx2r	51.9	0.37	4.2	0.77	2.75	0.15		16.49	22.38	0.87	0.02	99.9	1.89255	0.180503	0.107448	0.0730551	0.0832993	0.0221996	0.0101504	0.00463294	0.896416	0.874407	0.0615101	0.000930398		4.0266	0.914976						0.0611771		0.0193348	0.0220795	0.0726596	0.755599	0.0691501	0.410611	0.587848	0.00154055	0.589389
210	HAM-012	Cpx	3	c	1	HAM012-cpx3c	52.01	0.49	5.21	0.99	2.55	0.06		16.37	22.06	1.25		100.99	1.87337	0.221172	0.126634	0.0945379	0.076199	0.0281933	0.013278	0.00183051	0.879009	0.851362	0.0872957			4.03171	0.920228						0.0865772		0.00881714	0.0279613	0.0937599	0.713817	0.0690671	0.403518	0.61036	-0.0138785	0.596482
211	HAM-012	Cpx	3	r	1	HAM012-cpx3r	52.08	0.39	4.22	0.84	3.02	0.11		16.93	21.66	1.08		100.33	1.8902	0.180512	0.109796	0.0707163	0.0908755	0.0241042	0.0106488	0.00338155	0.916016	0.842305	0.0759991			4.03405	0.909747						0.075246		0.0273398	0.0238653	0.0700155	0.712738	0.0907955	0.397935	0.610555	-0.00848967	0.602065
212	SOU-002	Cpx	1	c	1	SOU002-cpx1c	50.75	0.55	7.72	0.91	2.88	0.14		14.87	20.13	1.7		99.65	1.84584	0.330926	0.154163	0.176763	0.087156	0.0261682	0.0150494	0.00431291	0.806263	0.784466	0.119882			4.02006	0.902447						0.0611869	0.058653		0.0261591	0.118048	0.639985	0.0959676	0.350709	0.629047	0.0202444	0.649291
213	SOU-002	Cpx	1	r	1	SOU002-cpx1r	50.85	0.66	6.53	0.76	3.07	0.15		15.4	20.9	1.3	0.01	99.63	1.85527	0.280792	0.144733	0.136058	0.0931744	0.0219232	0.0181159	0.00463545	0.837615	0.817024	0.0919614	0.000465451		4.02097	0.899897						0.0641486	0.0279161		0.0219478	0.108295	0.687699	0.0899939	0.375502	0.603532	0.020966	0.624498
214	SOU-002	Cpx	2	c	1	SOU002-cpx2c	50.42	0.57	6.73	0.85	2.95	0.06		15.27	20.77	1.26		98.88	1.85185	0.291323	0.148148	0.143174	0.0901794	0.024683	0.0157499	0.00186655	0.836086	0.817359	0.0897265			4.01882	0.902642						0.0574653	0.0322071		0.024668	0.110881	0.681317	0.0934619	0.369614	0.606673	0.0237126	0.630386
215	SOU-002	Cpx	2	r	1	SOU002-cpx2r	50.15	0.55	6.18	0.76	3.1	0.09		15.71	20.91	1.37		98.82	1.84856	0.268477	0.151437	0.11704	0.0946216	0.0221489	0.015252	0.0028099	0.863273	0.82583	0.0979108			4.03889	0.901219						0.0969019		0.0201839	0.0219206	0.115834	0.659381	0.0857783	0.382079	0.635352	-0.0174304	0.617921
216	SOU-002	Cpx	3	c	1
217	SOU-002	Cpx	3	c	2
218	SOU-002	Cpx	3	c	3
219	SOU-002	Cpx	3	r	1
220	SOU-002	Cpx	3	r	2
221	SOU-002	Cpx	3	r	3
222	SOU-002	Cpx	4	c	1
223	SOU-002	Cpx	4	c	2
224	SOU-002	Cpx	4	r	1
225	SOU-002	Cpx	4	r	2
226	SOU-002	Cpx	4	r	3
227	SOU-002	Cpx	5	c	1
228	SOU-002	Cpx	5	c	2
229	SOU-002	Cpx	5	r	1
230	SOU-002	Cpx	5	r	2
231	SOU-002	Cpx	5	r	3
232	SOU-002	Cpx	6	c	1
233	SOU-002	Cpx	6	c	2
234	SOU-002	Cpx	6	r	1
235	SOU-002	Cpx	6	r	2
236	SOU-002	Cpx	6	r	3
237	SOU-002	Cpx	7	c	1
238	SOU-002	Cpx	7	c	2
239	SOU-002	Cpx	7	r	1
240	SOU-002	Cpx	7	r	2
241	SOU-002	Cpx	7	r	3
242	HAM-018	Cpx	1	c	1	HAM018-cpx1c	50.32	0.45	5.77	0.72	3.89	0.22		15.39	21.47	0.98	0.01	99.22	1.85552	0.250759	0.144479	0.10628	0.119028	0.020991	0.0124835	0.00687121	0.846004	0.848263	0.0700645	0.000470418		4.03045	0.876659						0.0696941		0.0232439	0.02088	0.105718	0.693937	0.0865276	0.383845	0.598061	0.0180943	0.616155
243	HAM-018	Cpx	1	r	1	HAM018-cpx1r	51.01	0.36	4.55	0.6	3.84	0.04		15.79	21.72	0.72		98.63	1.88843	0.198524	0.111573	0.0869506	0.118318	0.0175619	0.0100265	0.00125427	0.871436	0.861545	0.0516802			4.01877	0.880458						0.0514874		0.00604961	0.0174963	0.0866261	0.748158	0.0901828	0.40132	0.559775	0.0389045	0.59868
244	HAM-018	Cpx	2	c	1	HAM018-cpx2c	50.17	0.43	5.64	0.77	3.76	0.15		15.37	21.9	0.94		99.13	1.85321	0.245536	0.146789	0.0987474	0.115162	0.0224878	0.0119495	0.00469307	0.846376	0.866758	0.0673218			4.0335	0.880232						0.0667592		0.034964	0.0222999	0.0979222	0.70433	0.073725	0.388793	0.602254	0.00895253	0.611207
245	HAM-018	Cpx	2	r	1	HAM018-cpx2r	50.7	0.32	4.98	0.49	4.03	0.15		15.92	21.57	0.84	0.01	99.01	1.87282	0.216807	0.127179	0.0896277	0.123478	0.0143106	0.0088928	0.00469316	0.876677	0.853712	0.0601609	0.000471245		4.03202	0.876541						0.0596253		0.0378186	0.0141832	0.0888297	0.70528	0.0942633	0.385888	0.59698	0.0171318	0.614112
246	HAM-018	Cpx	3	r	1	HAM018-cpx3r	51.63	0.4	5.02	0.52	3.9	0.14		15.94	22	0.89		100.44	1.87824	0.215233	0.121759	0.093474	0.117855	0.0149564	0.0109474	0.00431383	0.864462	0.857522	0.0627749			4.02631	0.880023						0.0624302		0.0178919	0.0148743	0.0929607	0.727085	0.0847578	0.396938	0.578253	0.0248098	0.603062
247	HAM-018	Cpx	3	c	1	HAM018-cpx3c	51.64	0.35	5.07	0.5	3.94	0.12		15.99	21.86	0.74	0.01	100.22	1.88075	0.217625	0.119245	0.0983804	0.119411	0.0143976	0.0095899	0.0037018	0.868166	0.85304	0.0522546	0.000464627		4.01941	0.879087						0.0521074		0.00743541	0.0143571	0.0981033	0.730741	0.0972558	0.39253	0.568385	0.0390852	0.60747
248	HAM-018	Cpx	4	c	1	HAM018-cpx4c	50.99	0.32	4.98	0.42	3.96	0.11		15.48	22.12	0.79		99.17	1.88026	0.21643	0.119744	0.096686	0.121371	0.0122449	0.00887733	0.00343566	0.850965	0.873957	0.0564815			4.02402	0.875176						0.0561528		0.0172697	0.0121737	0.0961234	0.743305	0.0749749	0.402069	0.566308	0.0316231	0.597931
249	HAM-018	Cpx	5	c	1	HAM018-cpx5c	50.16	0.49	6.16	0.71	4.13	0.2		15.16	21.38	0.94		99.33	1.84829	0.267516	0.15171	0.115806	0.126399	0.0206845	0.0135834	0.00624206	0.832761	0.844099	0.0671564			4.02673	0.868219						0.0669253		0.0150369	0.0206134	0.115408	0.690137	0.0918803	0.379838	0.588936	0.031226	0.620162
250	HAM-018	Cpx	5	r	1	HAM018-cpx5r	50.73	0.38	5.19	0.45	4.03	0.09		15.63	22.07	0.99		99.56	1.86628	0.225027	0.13372	0.0913071	0.122779	0.0130888	0.0105171	0.0028044	0.857195	0.869936	0.0706145			4.03824	0.874712						0.0697455		0.046013	0.0129277	0.0901834	0.710106	0.0710243	0.394784	0.601303	0.00391268	0.605216
251	HAM-018	Cpx	6	c	1
252	HAM-018	Cpx	6	c	2
253	HAM-018	Cpx	6	c	3
254	HAM-018	Cpx	6	r	1
255	HAM-018	Cpx	6	r	2
256	HAM-018	Cpx	6	r	3
257	HAM-018	Cpx	7	c	1
258	HAM-018	Cpx	7	c	2
259	HAM-018	Cpx	7	c	3
260	HAM-018	Cpx	7	r	1
261	HAM-018	Cpx	7	r	2
262	HAM-018	Cpx	7	r	3
263	HAM-018	Cpx	8	c	1
264	HAM-018	Cpx	8	c	2
265	HAM-018	Cpx	8	c	3
266	HAM-018	Cpx	8	r	1
267	HAM-018	Cpx	8	r	2
268	HAM-018	Cpx	8	r	3
269	HAM-018	Cpx	9	c	1
270	HAM-018	Cpx	9	c	2
271	HAM-018	Cpx	9	c	3
272	HAM-018	Cpx	9	r	1
273	HAM-018	Cpx	9	r	2
274	HAM-018	Cpx	9	r	3
275	HAM-018	Cpx	10	c	1
276	HAM-018	Cpx	10	c	2
277	HAM-018	Cpx	10	c	3
278	HAM-018	Cpx	10	r	1
279	HAM-018	Cpx	10	r	2
280	HAM-018	Cpx	10	r	3
281	DZ-009	Cpx	1	c	1	DZ009-cpx1c	50.85	0.4	7.01	1.35	2.53	0.13		14.79	21.05	1.59		99.7	1.85285	0.301039	0.147152	0.153887	0.0766679	0.0388918	0.010965	0.00401215	0.803389	0.821815	0.112329			4.02196	0.912883						0.066552	0.0453866		0.0387565	0.107965	0.672235	0.0691043	0.370683	0.621669	0.00764806	0.629317
282	DZ-009	Cpx	1	r	1	DZ009-cpx1r	50.66	0.35	5.31	1.05	2.82	0.04		16.22	21.31	1.4		99.16	1.86203	0.230023	0.137974	0.0920493	0.0856578	0.030513	0.00967807	0.00124528	0.888751	0.839223	0.099769			4.04689	0.912093						0.0980067		0.0415193	0.029974	0.0904233	0.662482	0.0775944	0.387082	0.654431	-0.0415133	0.612918
283	DZ-009	Cpx	3	l	1	DZ009-lam-in-opx1	49.95	0.55	6.22	1.27	2.92	0.1		16.14	20.01	1.19		98.35	1.84532	0.270821	0.154679	0.116142	0.0895884	0.037095	0.0152862	0.00312912	0.888891	0.792057	0.0852374			4.02743	0.908441						0.0832009	0.00165418		0.0369286	0.113967	0.63761	0.12664	0.362029	0.633685	0.0042864	0.637971
284	DZ-009	Cpx	2	c	1	DZ009-cpx2c	50.6	0.46	6.41	1.35	2.51	0.08		15.12	20.67	1.48		98.68	1.86127	0.27789	0.138726	0.139165	0.0768271	0.0392616	0.0127297	0.0024925	0.829125	0.814655	0.105552			4.01981	0.915197						0.0601461	0.0451649		0.0391718	0.0936815	0.679937	0.0818982	0.37089	0.616803	0.0123068	0.62911
285	DZ-009	Cpx	2	r	1	DZ009-cpx2r	50.03	0.44	5.4	1.05	2.69	0.07		15.91	21.29	1.39		98.27	1.85641	0.236152	0.143593	0.0925593	0.0824898	0.030804	0.0122827	0.00220002	0.880079	0.846431	0.100001			4.04685	0.914302						0.0984086		0.0411356	0.0303135	0.0910854	0.670418	0.0686392	0.390634	0.653402	-0.0440357	0.609366
286	DZ-009	Cpx	4	c	1
287	DZ-009	Cpx	4	c	2
288	DZ-009	Cpx	4	c	3
289	DZ-009	Cpx	4	r	1
290	DZ-009	Cpx	4	r	2
291	DZ-009	Cpx	4	r	3
292	DZ-009	Cpx	5	c	1
293	DZ-009	Cpx	5	c	2
294	DZ-009	Cpx	5	c	3
295	DZ-009	Cpx	5	r	1
296	DZ-009	Cpx	5	r	2
297	DZ-009	Cpx	5	r	3
298	DZ-009	Cpx	6	c	1
299	DZ-009	Cpx	6	c	2
300	DZ-009	Cpx	6	c	3
301	DZ-009	Cpx	6	r	1
302	DZ-009	Cpx	6	r	2
303	DZ-009	Cpx	6	r	3
304	DZ-009	Cpx	7	c	1
305	DZ-009	Cpx	7	c	2
306	DZ-009	Cpx	7	c	3
307	DZ-009	Cpx	7	r	1
308	DZ-009	Cpx	7	r	2
309	DZ-009	Cpx	7	r	3
310	DZ-009	Cpx	8	c	1
311	DZ-009	Cpx	8	c	2
312	DZ-009	Cpx	8	c	3
313	DZ-009	Cpx	8	r	1
314	DZ-009	Cpx	8	r	2
315	DZ-009	Cpx	8	r	3
316	GU-001	Cpx	1	c	1	GU001-cpx1c	51.41	0.48	6.22	1.35	2.53	0.11		15.34	21.38	1.36		100.18	1.86445	0.265858	0.135548	0.130309	0.0763913	0.038709	0.0130962	0.00337895	0.829349	0.830777	0.0956289			4.01764	0.915659						0.053677	0.0418963		0.0386865	0.0883374	0.703269	0.0741335	0.378694	0.604766	0.0165406	0.621306
317	GU-001	Cpx	1	c	2	GU001-cpx1c	51.41	0.48	6.22	1.35	2.53	0.11		15.34	21.38	1.36		100.18	1.86445	0.265858	0.135548	0.130309	0.0763913	0.038709	0.0130962	0.00337895	0.829349	0.830777	0.0956289			4.01764	0.915659						0.053677	0.0418963		0.0386865	0.0883374	0.703269	0.0741335	0.378694	0.604766	0.0165406	0.621306
318	GU-001	Cpx	1	r	1	GU001-cpx1r	51.51	0.44	4.88	0.94	2.55	0.12		16.3	21.85	1.07		99.66	1.87986	0.209898	0.120144	0.0897545	0.0772993	0.0271229	0.0120805	0.00370937	0.886807	0.854393	0.0757118			4.02688	0.919823						0.0752944		0.00592122	0.0269733	0.0892597	0.727528	0.0750236	0.403637	0.599314	-0.00295097	0.596363
319	GU-001	Cpx	1	r	2	GU001-cpx1r	51.51	0.44	4.88	0.94	2.55	0.12		16.3	21.85	1.07		99.66	1.87986	0.209898	0.120144	0.0897545	0.0772993	0.0271229	0.0120805	0.00370937	0.886807	0.854393	0.0757118			4.02688	0.919823						0.0752944		0.00592122	0.0269733	0.0892597	0.727528	0.0750236	0.403637	0.599314	-0.00295097	0.596363
320	GU-001	Cpx	1	r	3	GU001-cpx1r	51.51	0.44	4.88	0.94	2.55	0.12		16.3	21.85	1.07		99.66	1.87986	0.209898	0.120144	0.0897545	0.0772993	0.0271229	0.0120805	0.00370937	0.886807	0.854393	0.0757118			4.02688	0.919823						0.0752944		0.00592122	0.0269733	0.0892597	0.727528	0.0750236	0.403637	0.599314	-0.00295097	0.596363
321	GU-001	Cpx	2	c	1	GU001-cpx2c	50.7	0.5	6.26	1.37	2.35	0.09		15.39	21.48	1.46		99.6	1.85196	0.269497	0.14804	0.121457	0.0712289	0.0395657	0.0137402	0.00278453	0.838052	0.840681	0.103401			4.03091	0.921665						0.0930015	0.00966084		0.0392832	0.110928	0.684466	0.0626601	0.391529	0.625213	-0.016742	0.608471
322	GU-001	Cpx	2	c	2	GU001-cpx2c	50.7	0.5	6.26	1.37	2.35	0.09		15.39	21.48	1.46		99.6	1.85196	0.269497	0.14804	0.121457	0.0712289	0.0395657	0.0137402	0.00278453	0.838052	0.840681	0.103401			4.03091	0.921665						0.0930015	0.00966084		0.0392832	0.110928	0.684466	0.0626601	0.391529	0.625213	-0.016742	0.608471
323	GU-001	Cpx	2	r	1	GU001-cpx2r	49.84	0.44	5.17	1.18	2.64	0.05		15.9	21.68	1.32	0.02	98.24	1.85329	0.226575	0.146708	0.079867	0.0810489	0.0346915	0.0123089	0.00157478	0.881397	0.86377	0.095167	0.000948756		4.05077	0.915789						0.093487		0.0572865	0.034079	0.078457	0.678699	0.0579913	0.393031	0.661316	-0.0543477	0.606969
324	GU-001	Cpx	2	r	2	GU001-cpx2r	49.84	0.44	5.17	1.18	2.64	0.05		15.9	21.68	1.32	0.02	98.24	1.85329	0.226575	0.146708	0.079867	0.0810489	0.0346915	0.0123089	0.00157478	0.881397	0.86377	0.095167	0.000948756		4.05077	0.915789						0.093487		0.0572865	0.034079	0.078457	0.678699	0.0579913	0.393031	0.661316	-0.0543477	0.606969
325	GU-001	Cpx	2	r	3	GU001-cpx2r	49.84	0.44	5.17	1.18	2.64	0.05		15.9	21.68	1.32	0.02	98.24	1.85329	0.226575	0.146708	0.079867	0.0810489	0.0346915	0.0123089	0.00157478	0.881397	0.86377	0.095167	0.000948756		4.05077	0.915789						0.093487		0.0572865	0.034079	0.078457	0.678699	0.0579913	0.393031	0.661316	-0.0543477	0.606969
326	GU-001	Cpx	3	c	1
327	GU-001	Cpx	3	c	2
328	GU-001	Cpx	3	r	1
329	GU-001	Cpx	3	r	2
330	GU-001	Cpx	3	r	3
331	GU-001	Cpx	4	c	1
332	GU-001	Cpx	4	c	2
333	GU-001	Cpx	4	r	1
334	GU-001	Cpx	4	r	2
335	GU-001	Cpx	4	r	3
336	GU-001	Cpx	5	c	1
337	GU-001	Cpx	5	c	2
338	GU-001	Cpx	5	r	1
339	GU-001	Cpx	5	r	2
340	SOU-003	Cpx	1	c	1	SOU003-cpx1c	49.8	0.94	5.43	1.17	3.14	0.08		16.19	20.75	0.9	0.02	98.42	1.84503	0.237099	0.154969	0.0821301	0.0966654	0.0342717	0.0262001	0.00251044	0.89419	0.823693	0.0646493	0.000945285		4.02526	0.902442						0.0647918		0.0125217	0.0343472	0.0823112	0.69633	0.109699	0.379723	0.607024	0.0132526	0.620277
341	SOU-003	Cpx	1	r	1	SOU003-cpx1r	49.26	0.72	5.24	1.25	3.39	0.1		16.06	20.21	1	0.03	97.26	1.84894	0.231802	0.151056	0.0807454	0.105533	0.0370949	0.0203312	0.00317918	0.898635	0.812772	0.072774	0.00143651		4.0325	0.894905						0.0725001		0.0264433	0.0369553	0.0804416	0.665873	0.117786	0.370581	0.625095	0.0043237	0.629419
342	SOU-003	Cpx	2	c	1	SOU003-cpx2c	52.3	0.33	3.53	1.38	3.12	0.09		17.42	20.6	0.86	0.01	99.64	1.90713	0.151708	0.0928685	0.0588398	0.0947056	0.0397862	0.00905301	0.00277976	0.946969	0.804858	0.0608029	0.000465198		4.01826	0.909083						0.0556796	0.00494258		0.039668	0.0537224	0.709076	0.136912	0.383517	0.592182	0.0243009	0.616483
343	SOU-003	Cpx	2	r	1	SOU003-cpx2r	49.54	0.79	5.77	1.03	3.37	0.14		16.05	20.8	0.95		98.44	1.83752	0.252236	0.162481	0.0897552	0.103673	0.0302056	0.0220446	0.00439835	0.887482	0.826632	0.0683198			4.03251	0.895402						0.0681131		0.0308841	0.0301143	0.0894837	0.67365	0.107755	0.372007	0.624912	0.00308088	0.627993
344	SOU-003	Cpx	3	c	1	SOU003-cpx3c	50.91	0.84	4.54	1.36	2.99	0.08		16.61	20.75	0.94		99.02	1.87173	0.196721	0.128271	0.0684508	0.0914679	0.0395324	0.0232338	0.00249124	0.91037	0.817394	0.0670062			4.01995	0.9087						0.0611046	0.00609568		0.039647	0.0625535	0.717562	0.113038	0.388208	0.591934	0.0198574	0.611792
345	SOU-003	Cpx	3	r	1	SOU003-cpx3r	48.88	0.67	5.39	0.94	3.67	0.12		16.29	20.96	1.02	0.01	97.95	1.82934	0.237743	0.170658	0.0670855	0.113274	0.0278142	0.0188642	0.00380391	0.908852	0.840482	0.0740135	0.000477444		4.05467	0.889178						0.0728651		0.0909924	0.0273826	0.0660445	0.643021	0.0996945	0.363584	0.675957	-0.0395418	0.636416
346	SOU-003	Cpx	4	c	1
347	SOU-003	Cpx	4	c	2
348	SOU-003	Cpx	4	r	1
349	SOU-003	Cpx	4	r	2
350	SOU-003	Cpx	4	r	3
351	SOU-003	Cpx	5	c	1
352	SOU-003	Cpx	5	c	2
353	SOU-003	Cpx	5	r	1
354	SOU-003	Cpx	5	r	2
355	SOU-003	Cpx	5	r	3
356	SOU-003	Cpx	6	c	1
357	SOU-003	Cpx	6	c	2
358	SOU-003	Cpx	6	r	1
359	SOU-003	Cpx	6	r	2
360	SOU-003	Cpx	7	c	1
361	SOU-003	Cpx	7	c	2
362	SOU-003	Cpx	7	r	1
363	SOU-003	Cpx	7	r	2
364	SOU-003	Cpx	7	r	3
365	SOU-003	Cpx	7	r	4
366	SOU-003	Cpx	8	c	1
367	SOU-003	Cpx	8	c	2
368	SOU-003	Cpx	8	r	1
369	SOU-003	Cpx	8	r	2
370	SOU-003	Cpx	8	r	3
371	DZ-002	Cpx	1	c	1	DZ002_cpx1c	54.1682	0.07	3.3143	0.9727	2.7479	0.0797	0.0632	17.998	20.5816	0.9274	0.0263	100.949	1.93839	0.13978	0.0616109	0.0781688	0.0820552	0.0275201	0.00188449	0.00241569	0.960128	0.78913	0.0643444	0.00120063	0.00181926	4.00867	0.921266						0.0264706	0.0378305		0.0275016	0.0402857	0.720812	0.1471	0.373893	0.591854	0.0342531	0.626107
372	DZ-002	Cpx	1	c	2	DZ002_cpx1c	54.1682	0.07	3.3143	0.9727	2.7479	0.0797	0.0632	17.998	20.5816	0.9274	0.0263	100.949	1.93839	0.13978	0.0616109	0.0781688	0.0820552	0.0275201	0.00188449	0.00241569	0.960128	0.78913	0.0643444	0.00120063	0.00181926	4.00867	0.921266						0.0264706	0.0378305		0.0275016	0.0402857	0.720812	0.1471	0.373893	0.591854	0.0342531	0.626107
373	DZ-002	Cpx	1	r	1	DZ002_cpx1r	54.075	0.0739	3.4562	1.0551	2.8348	0.1017	0.0508	18.0079	20.2546	0.9801	0.0144	100.904	1.93555	0.145801	0.0644528	0.0813486	0.0846691	0.029859	0.00198999	0.00308328	0.960901	0.776791	0.0680181	0.000657549	0.00146269	4.00878	0.919021						0.0268298	0.0411344		0.0298354	0.0401497	0.70619	0.155861	0.366801	0.597262	0.0359376	0.633199
374	DZ-002	Cpx	1	r	2	DZ002_cpx1r	54.075	0.0739	3.4562	1.0551	2.8348	0.1017	0.0508	18.0079	20.2546	0.9801	0.0144	100.904	1.93555	0.145801	0.0644528	0.0813486	0.0846691	0.029859	0.00198999	0.00308328	0.960901	0.776791	0.0680181	0.000657549	0.00146269	4.00878	0.919021						0.0268298	0.0411344		0.0298354	0.0401497	0.70619	0.155861	0.366801	0.597262	0.0359376	0.633199
375	DZ-002	Cpx	1	r	3	DZ002_cpx1r	54.075	0.0739	3.4562	1.0551	2.8348	0.1017	0.0508	18.0079	20.2546	0.9801	0.0144	100.904	1.93555	0.145801	0.0644528	0.0813486	0.0846691	0.029859	0.00198999	0.00308328	0.960901	0.776791	0.0680181	0.000657549	0.00146269	4.00878	0.919021						0.0268298	0.0411344		0.0298354	0.0401497	0.70619	0.155861	0.366801	0.597262	0.0359376	0.633199
376	DZ-002	Cpx	2	c	1	DZ002_cpx2c	53.464	0.0769	3.3309	1.2446	2.4015	0.0567	0.0529	17.2028	22.0082	0.7897	0.0204	100.649	1.92649	0.141457	0.073507	0.0679497	0.0721709	0.0354577	0.00208465	0.00173051	0.924089	0.849696	0.0551715	0.000937766	0.00153336	4.01082	0.927558						0.032894	0.0221528		0.0353775	0.0456432	0.766753	0.0971793	0.40073	0.574882	0.024388	0.59927
377	DZ-002	Cpx	2	c	2	DZ002_cpx2c	53.464	0.0769	3.3309	1.2446	2.4015	0.0567	0.0529	17.2028	22.0082	0.7897	0.0204	100.649	1.92649	0.141457	0.073507	0.0679497	0.0721709	0.0354577	0.00208465	0.00173051	0.924089	0.849696	0.0551715	0.000937766	0.00153336	4.01082	0.927558						0.032894	0.0221528		0.0353775	0.0456432	0.766753	0.0971793	0.40073	0.574882	0.024388	0.59927
378	DZ-002	Cpx	2	r	1	DZ002_cpx2r	53.4001	0.1612	3.3935	1.3773	2.9104	0.0995	0.0517	17.8842	20.1541	0.9843	0.024	100.44	1.92479	0.14416	0.07521	0.06895	0.0874251	0.0392505	0.00437126	0.00303773	0.960991	0.778355	0.0687885	0.0011036	0.00149904	4.01377	0.916612						0.0420116	0.0266478		0.0391768	0.0421728	0.695545	0.154446	0.369472	0.602123	0.028405	0.630528
379	DZ-002	Cpx	2	r	2	DZ002_cpx2r	53.4001	0.1612	3.3935	1.3773	2.9104	0.0995	0.0517	17.8842	20.1541	0.9843	0.024	100.44	1.92479	0.14416	0.07521	0.06895	0.0874251	0.0392505	0.00437126	0.00303773	0.960991	0.778355	0.0687885	0.0011036	0.00149904	4.01377	0.916612						0.0420116	0.0266478		0.0391768	0.0421728	0.695545	0.154446	0.369472	0.602123	0.028405	0.630528
380	DZ-002	Cpx	2	r	3	DZ002_cpx2r	53.4001	0.1612	3.3935	1.3773	2.9104	0.0995	0.0517	17.8842	20.1541	0.9843	0.024	100.44	1.92479	0.14416	0.07521	0.06895	0.0874251	0.0392505	0.00437126	0.00303773	0.960991	0.778355	0.0687885	0.0011036	0.00149904	4.01377	0.916612						0.0420116	0.0266478		0.0391768	0.0421728	0.695545	0.154446	0.369472	0.602123	0.028405	0.630528
381	DZ-002	Cpx	3	c		DZ002_cpx3c	54.0106	0.2455	2.4622	1.4199	3.059	0.1244	0.049	18.3181	19.7019	0.9182	0.0137	100.322	1.94695	0.104606	0.0530508	0.0515548	0.0920755	0.0404677	0.00665775	0.00379823	0.984384	0.760951	0.0641741	0.000630021	0.00142087	4.00611	0.914464						0.0188062	0.0455737		0.0405974	0.00614638	0.716647	0.172229	0.366551	0.589533	0.0439159	0.633449
382	DZ-002	Cpx	3	r	1	DZ002_cpx3r	53.3969	0.3077	3.4515	1.4155	3.2081	0.1162	0.063	17.3928	19.9507	0.9999	0.0193	100.322	1.9282	0.146892	0.0718005	0.0750919	0.0967573	0.040413	0.00835918	0.00355408	0.936298	0.771911	0.0700067	0.000889102	0.00183003	4.00511	0.906339						0.0157641	0.0545775		0.0406063	0.0208737	0.714124	0.154055	0.363206	0.586051	0.0507425	0.636794
383	DZ-002	Cpx	3	r	2	DZ002_cpx3r	53.3969	0.3077	3.4515	1.4155	3.2081	0.1162	0.063	17.3928	19.9507	0.9999	0.0193	100.322	1.9282	0.146892	0.0718005	0.0750919	0.0967573	0.040413	0.00835918	0.00355408	0.936298	0.771911	0.0700067	0.000889102	0.00183003	4.00511	0.906339						0.0157641	0.0545775		0.0406063	0.0208737	0.714124	0.154055	0.363206	0.586051	0.0507425	0.636794
384	DZ-002	Cpx	3	r	3	DZ002_cpx3r	53.3969	0.3077	3.4515	1.4155	3.2081	0.1162	0.063	17.3928	19.9507	0.9999	0.0193	100.322	1.9282	0.146892	0.0718005	0.0750919	0.0967573	0.040413	0.00835918	0.00355408	0.936298	0.771911	0.0700067	0.000889102	0.00183003	4.00511	0.906339						0.0157641	0.0545775		0.0406063	0.0208737	0.714124	0.154055	0.363206	0.586051	0.0507425	0.636794
385	DZ-002	Cpx	4	c	1	DZ002_cpx4c	53.2322	0.0903	3.1093	1.1373	2.8557	0.0844	0.0513	17.4521	21.1083	0.859	0.0067	99.9866	1.93083	0.132919	0.0691676	0.0637518	0.086318	0.0326152	0.0024641	0.00259297	0.943684	0.820345	0.0604102	0.00031003	0.00149682	4.01399	0.916196						0.0425844	0.0176113		0.0324994	0.0459142	0.73902	0.122371	0.392194	0.580975	0.026831	0.607806
386	DZ-002	Cpx	4	r	1	DZ002_cpx4r	53.586	0.1561	3.0425	0.9572	3.018	0.0865	0.0401	17.7402	20.367	0.9162	0.0135	99.9233	1.94017	0.12983	0.0598349	0.0699947	0.0911698	0.0274009	0.00425197	0.0026527	0.957534	0.79011	0.0643168	0.000623562	0.00116792	4.00922	0.913064						0.0282396	0.0360603		0.0273937	0.0339159	0.728592	0.145798	0.378516	0.583163	0.0383216	0.621484
387	DZ-002	Cpx	5	c	1
388	DZ-002	Cpx	5	c	2
389	DZ-002	Cpx	5	r	1
390	DZ-002	Cpx	5	r	2
391	DZ-002	Cpx	5	r	3
392	DZ-002	Cpx	6	i	1
393	DZ-002	Cpx	6	i	2
394	DZ-002	Cpx	6	i	3
395	HAM-005b	Cpx	1	c	1	HAM005b_cpx1c	52.8976	0.1118	4.3527	1.0782	2.3115	0.0683	0.0389	16.7623	21.2707	1.0847	0.0064	99.9831	1.91434	0.185651	0.0856644	0.0999863	0.0697399	0.0308501	0.00304386	0.00209357	0.904324	0.824778	0.0761095	0.000295475	0.00113244	4.01235	0.928403						0.0374912	0.0383987		0.0307611	0.0612991	0.730338	0.101712	0.385025	0.593868	0.0211064	0.614975
396	HAM-005b	Cpx	1	c	2	HAM005b_cpx1c	52.8976	0.1118	4.3527	1.0782	2.3115	0.0683	0.0389	16.7623	21.2707	1.0847	0.0064	99.9831	1.91434	0.185651	0.0856644	0.0999863	0.0697399	0.0308501	0.00304386	0.00209357	0.904324	0.824778	0.0761095	0.000295475	0.00113244	4.01235	0.928403						0.0374912	0.0383987		0.0307611	0.0612991	0.730338	0.101712	0.385025	0.593868	0.0211064	0.614975
397	HAM-005b	Cpx	1	r	1	HAM005b_cpx1r	52.5578	0.1228	4.2376	0.9674	2.6637	0.0683	0.042	17.301	20.8481	1.09	0.0088	99.9075	1.90599	0.181117	0.0940076	0.0871096	0.0802894	0.0277373	0.00335029	0.00209793	0.935328	0.810072	0.0766403	0.000407123	0.00122522	4.02426	0.920945						0.073176	0.00281177		0.0275012	0.0835561	0.692117	0.120838	0.385933	0.609839	0.00422824	0.614067
398	HAM-005b	Cpx	1	r	2	HAM005b_cpx1r	52.5578	0.1228	4.2376	0.9674	2.6637	0.0683	0.042	17.301	20.8481	1.09	0.0088	99.9075	1.90599	0.181117	0.0940076	0.0871096	0.0802894	0.0277373	0.00335029	0.00209793	0.935328	0.810072	0.0766403	0.000407123	0.00122522	4.02426	0.920945						0.073176	0.00281177		0.0275012	0.0835561	0.692117	0.120838	0.385933	0.609839	0.00422824	0.614067
399	HAM-005b	Cpx	1	r	3	HAM005b_cpx1r	52.5578	0.1228	4.2376	0.9674	2.6637	0.0683	0.042	17.301	20.8481	1.09	0.0088	99.9075	1.90599	0.181117	0.0940076	0.0871096	0.0802894	0.0277373	0.00335029	0.00209793	0.935328	0.810072	0.0766403	0.000407123	0.00122522	4.02426	0.920945						0.073176	0.00281177		0.0275012	0.0835561	0.692117	0.120838	0.385933	0.609839	0.00422824	0.614067
400	HAM-005b	Cpx	2	c	1	HAM005b_cpx3c	52.6882	0.1194	4.6396	1.1028	1.9714	0.083	0.0397	16.2452	21.5328	1.1656	0.0125	99.6002	1.9131	0.198546	0.0868954	0.111651	0.0597173	0.031659	0.00326159	0.00255264	0.879344	0.83772	0.0820582	0.00057902	0.00115957	4.0097	0.936407						0.029445	0.052525		0.031625	0.0590059	0.74619	0.0812092	0.388234	0.591427	0.0203391	0.611766
401	HAM-005b	Cpx	2	r	1	HAM005b_cpx3r	52.324	0.1594	4.0577	0.8936	3.2243	0.1219	0.0657	16.8067	20.8096	1.0149	0.0062	99.484	1.91065	0.174629	0.0893515	0.0852772	0.0979552	0.0257987	0.00437893	0.00377024	0.914894	0.814173	0.0718538	0.000288822	0.00192987	4.02032	0.903287						0.061859	0.00963906		0.025671	0.0752159	0.709255	0.11836	0.387476	0.589466	0.0230585	0.612524
402	HAM-005b	Cpx	3	c	1
403	HAM-005b	Cpx	3	c	2
404	HAM-005b	Cpx	3	c	3
405	HAM-005b	Cpx	3	r	1
406	HAM-005b	Cpx	3	r	2
407	HAM-005b	Cpx	3	r	3
408	HAM-005b	Cpx	4	c	1
409	HAM-005b	Cpx	4	c	2
410	HAM-005b	Cpx	4	r	1
411	HAM-005b	Cpx	4	r	2
412	HAM-005b	Cpx	4	r	3
413	HAM-005b	Cpx	5	c	1
414	HAM-005b	Cpx	5	c	2
415	HAM-005b	Cpx	5	r	1
416	HAM-005b	Cpx	5	r	2
417	HAM-005b	Cpx	5	r	3
418	HAM-005b	Cpx	6	c	1
419	HAM-005b	Cpx	6	c	2
420	HAM-005b	Cpx	6	r	1
421	HAM-005b	Cpx	6	r	2
422	HAM-005b	Cpx	6	r	3
423	HAM-005b	Cpx	7	c	1
424	HAM-005b	Cpx	7	c	2
425	HAM-005b	Cpx	7	r	1
426	HAM-005b	Cpx	7	r	2
427	HAM-005b	Cpx	7	r	3
428	HAM-005b	Cpx	8	c	1
429	HAM-005b	Cpx	8	c	2
430	HAM-005b	Cpx	8	r	1
431	HAM-005b	Cpx	8	r	2
432	DZ-007	Cpx	1	c	1	DZ007_cpx1c	52.6148	0.0978	3.7585	0.6991	2.5776	0.1031	0.0736	16.3995	20.5612	1.1509	0.0133	98.0494	1.93966	0.163301	0.0603419	0.102959	0.0793261	0.0203766	0.00271242	0.0032193	0.901273	0.812155	0.0822625	0.0006255	0.00218262	4.00709	0.919104						0.0216836	0.0606468		0.0203934	0.0423967	0.750035	0.104845	0.385541	0.577512	0.0369472	0.614459
433	DZ-007	Cpx	1	c	2	DZ007_cpx1c	52.6148	0.0978	3.7585	0.6991	2.5776	0.1031	0.0736	16.3995	20.5612	1.1509	0.0133	98.0494	1.93966	0.163301	0.0603419	0.102959	0.0793261	0.0203766	0.00271242	0.0032193	0.901273	0.812155	0.0822625	0.0006255	0.00218262	4.00709	0.919104						0.0216836	0.0606468		0.0203934	0.0423967	0.750035	0.104845	0.385541	0.577512	0.0369472	0.614459
434	DZ-007	Cpx	1	r	1	DZ007_cpx1r	52.339	0.1009	3.6311	0.8529	2.6967	0.0801	0.0719	16.5053	20.564	1.1837	0.0136	98.0392	1.93327	0.158074	0.0667285	0.0913458	0.0829903	0.0249081	0.00280388	0.00250602	0.908865	0.813857	0.0847727	0.000640863	0.00213638	4.01483	0.916328						0.0450975	0.0393905		0.0248244	0.0516485	0.734651	0.104388	0.391188	0.584539	0.0242731	0.608812
435	DZ-007	Cpx	1	r	2	DZ007_cpx1r	52.339	0.1009	3.6311	0.8529	2.6967	0.0801	0.0719	16.5053	20.564	1.1837	0.0136	98.0392	1.93327	0.158074	0.0667285	0.0913458	0.0829903	0.0249081	0.00280388	0.00250602	0.908865	0.813857	0.0847727	0.000640863	0.00213638	4.01483	0.916328						0.0450975	0.0393905		0.0248244	0.0516485	0.734651	0.104388	0.391188	0.584539	0.0242731	0.608812
436	DZ-007	Cpx	2	c	1
437	DZ-007	Cpx	2	r	1
438	DZ-007	Cpx	3	c	1
439	DZ-007	Cpx	3	c	2
440	DZ-007	Cpx	3	r	1
441	DZ-007	Cpx	3	r	2
442	DZ-007	Cpx	3	r	3
443	DZ-007	Cpx	4	c	1
444	DZ-007	Cpx	4	c	2
445	DZ-007	Cpx	4	r	1
446	DZ-007	Cpx	4	r	2
447	DZ-007	Cpx	5	c	1
448	DZ-007	Cpx	5	c	2
449	DZ-007	Cpx	5	r	1
450	DZ-007	Cpx	5	r	2
451	DZ-007	Cpx	5	r	3
452	DZ-007	Cpx	6	c	1
453	DZ-007	Cpx	6	c	2
454	DZ-007	Cpx	6	r	1
455	DZ-007	Cpx	6	r	2
456	HAM-017	Cpx	1	c	1	HAM017_cpx1c	52.0379	0.5439	4.4832	1.4063	2.3303	0.0796	0.0222	15.9564	20.5163	1.1935	0.011	98.5806	1.91017	0.193953	0.0898295	0.104123	0.0715345	0.0408136	0.0150201	0.00247486	0.873164	0.806909	0.0849418	0.000515114	0.000655523	4.00015	0.924278						0.000468306	0.0852672		0.041195	0.0198291	0.753424	0.0998163	0.373457	0.579385	0.0471586	0.626543
457	HAM-017	Cpx	1	c	2	HAM017_cpx1c	52.0379	0.5439	4.4832	1.4063	2.3303	0.0796	0.0222	15.9564	20.5163	1.1935	0.011	98.5806	1.91017	0.193953	0.0898295	0.104123	0.0715345	0.0408136	0.0150201	0.00247486	0.873164	0.806909	0.0849418	0.000515114	0.000655523	4.00015	0.924278						0.000468306	0.0852672		0.041195	0.0198291	0.753424	0.0998163	0.373457	0.579385	0.0471586	0.626543
458	HAM-017	Cpx	1	r	1	HAM017_cpx1r	53.1508	0.3841	3.5082	1.0223	2.6984	0.0817	0.063	16.6814	20.8108	1.1285	0.0083	99.5375	1.93351	0.15041	0.066489	0.0839211	0.0819698	0.0294029	0.0105119	0.00251735	0.904644	0.811145	0.0795949	0.000385189	0.00184357	4.00594	0.916918						0.0182395	0.0617281		0.0295406	0.0225859	0.762817	0.105089	0.388708	0.571012	0.0402802	0.611292
459	HAM-017	Cpx	1	r	2	HAM017_cpx1r	53.1508	0.3841	3.5082	1.0223	2.6984	0.0817	0.063	16.6814	20.8108	1.1285	0.0083	99.5375	1.93351	0.15041	0.066489	0.0839211	0.0819698	0.0294029	0.0105119	0.00251735	0.904644	0.811145	0.0795949	0.000385189	0.00184357	4.00594	0.916918						0.0182395	0.0617281		0.0295406	0.0225859	0.762817	0.105089	0.388708	0.571012	0.0402802	0.611292
460	HAM-017	Cpx	1	r	3	HAM017_cpx1r	53.1508	0.3841	3.5082	1.0223	2.6984	0.0817	0.063	16.6814	20.8108	1.1285	0.0083	99.5375	1.93351	0.15041	0.066489	0.0839211	0.0819698	0.0294029	0.0105119	0.00251735	0.904644	0.811145	0.0795949	0.000385189	0.00184357	4.00594	0.916918						0.0182395	0.0617281		0.0295406	0.0225859	0.762817	0.105089	0.388708	0.571012	0.0402802	0.611292
461	HAM-017	Cpx	2	c	1	HAM017_opx2c	52.2735	0.4975	4.1848	1.3261	2.3142	0.0613	0.0204	15.9097	21.3524	1.1364	0.015	99.0913	1.91271	0.180467	0.0872867	0.0931807	0.0707314	0.0383636	0.013695	0.00189983	0.867838	0.837121	0.0806207	0.000700194	0.000600455	4.00475	0.924639						0.0145808	0.0665324		0.038598	0.0272176	0.776419	0.0766518	0.393099	0.569966	0.0369359	0.606901
462	HAM-017	Cpx	2	r	1	HAM017_opx2r	52.565	0.4754	3.9558	1.2507	2.5665	0.0775	0.0321	16.1387	21.0884	1.1151	0.0176	99.2828	1.91953	0.17025	0.0804736	0.0897765	0.0782996	0.0361098	0.0130604	0.00239709	0.878566	0.825114	0.0789511	0.000819915	0.000942941	4.00404	0.918171						0.0124254	0.0670495		0.0363494	0.0233226	0.770917	0.0899361	0.38909	0.56825	0.04266	0.61091
463	HAM-017	Cpx	3	c	1	HAM017_cpx3c	52.2088	0.4684	4.0198	1.3585	2.3282	0.0452	0.0419	15.9488	21.2654	1.1051	0.0164	98.8065	1.9159	0.173856	0.0840987	0.0897572	0.0713771	0.0394152	0.0129314	0.00140493	0.872501	0.836134	0.0786281	0.000767771	0.00123687	4.00415	0.924379						0.0127532	0.0663569		0.0396569	0.0239506	0.777653	0.0796293	0.392795	0.568928	0.0382772	0.607205
464	HAM-017	Cpx	3	c	2	HAM017_cpx3c	52.2088	0.4684	4.0198	1.3585	2.3282	0.0452	0.0419	15.9488	21.2654	1.1051	0.0164	98.8065	1.9159	0.173856	0.0840987	0.0897572	0.0713771	0.0394152	0.0129314	0.00140493	0.872501	0.836134	0.0786281	0.000767771	0.00123687	4.00415	0.924379						0.0127532	0.0663569		0.0396569	0.0239506	0.777653	0.0796293	0.392795	0.568928	0.0382772	0.607205
465	HAM-017	Cpx	3	r	1	HAM017_cpx3r	52.7925	0.4308	3.7173	1.2334	2.5615	0.0656	0.0424	16.1159	21.1312	1.0896	0.0108	99.191	1.92874	0.160061	0.0712571	0.0888038	0.0782563	0.0356271	0.0118407	0.00202998	0.877739	0.827179	0.077182	0.000503367	0.00124609	4.00041	0.918141						0.00125454	0.0765191		0.0359002	0.0129655	0.784653	0.0887073	0.389965	0.560829	0.0492062	0.610035
466	HAM-017	Cpx	3	r	2	HAM017_cpx3r	52.7925	0.4308	3.7173	1.2334	2.5615	0.0656	0.0424	16.1159	21.1312	1.0896	0.0108	99.191	1.92874	0.160061	0.0712571	0.0888038	0.0782563	0.0356271	0.0118407	0.00202998	0.877739	0.827179	0.077182	0.000503367	0.00124609	4.00041	0.918141						0.00125454	0.0765191		0.0359002	0.0129655	0.784653	0.0887073	0.389965	0.560829	0.0492062	0.610035
467	HAM-017	Cpx	3	r	3	HAM017_cpx3r	52.7925	0.4308	3.7173	1.2334	2.5615	0.0656	0.0424	16.1159	21.1312	1.0896	0.0108	99.191	1.92874	0.160061	0.0712571	0.0888038	0.0782563	0.0356271	0.0118407	0.00202998	0.877739	0.827179	0.077182	0.000503367	0.00124609	4.00041	0.918141						0.00125454	0.0765191		0.0359002	0.0129655	0.784653	0.0887073	0.389965	0.560829	0.0492062	0.610035
468	HAM-017	Cpx	4	c	1
469	HAM-017	Cpx	4	c	2
470	HAM-017	Cpx	4	r	1
471	HAM-017	Cpx	4	r	2
472	HAM-017	Cpx	4	r	3
473	HAM-017	Cpx	5	i	1
474	HAM-017	Cpx	5	i	2
475	HAM-017	Cpx	6	c	1
476	HAM-017	Cpx	6	c	2
477	HAM-017	Cpx	6	r	1
478	HAM-017	Cpx	6	r	2
479	HAM-017	Cpx	6	r	3
480	HAM-017	Cpx	7	c	1
481	HAM-017	Cpx	7	c	2
482	HAM-017	Cpx	7	r	1
483	HAM-017	Cpx	7	r	2
484	HAM-017	Cpx	7	r	3
485	HAM-017	Cpx	8	c	1
486	HAM-017	Cpx	8	c	2
487	HAM-017	Cpx	8	r	1
488	HAM-017	Cpx	8	r	2
489	HAM-017	Cpx	8	r	3
490	HAM-004	Cpx	1	i	1
491	HAM-004	Cpx	1	i	1
492	HAM-004	Cpx	2	c	1
493	HAM-004	Cpx	2	c	2
494	HAM-004	Cpx	2	r	1
495	HAM-004	Cpx	2	r	2
496	HAM-004	Cpx	2	r	3
497	HAM-004	Cpx	3	i	1
498	HAM-004	Cpx	3	i	2
499	HAM-004	Cpx	4	i	1
500	HAM-004	Cpx	4	i	2
501	HAM-004	Cpx	5	i	1
502	HAM-004	Cpx	5	i	2
503	HAM-004	Cpx	6	i	1
504	HAM-004	Cpx	6	i	2
505	HAM-004	Cpx	6	i	3
506	HAM-004	Cpx	6	i	4
507	DZ-003	Spl	1	c	1	DZ-3-spl1c	0.03	0.71	28.73	37.59	15.72	0.18	0.27	16.69				99.92	0.000889575	1.00404			0.389836	0.881269	0.0158387	0.00452084	0.737779				0.00644032	3.04062	0.654283	0.467439
508	DZ-003	Spl	1	r	1	DZ-3-spl1r	0.07	0.76	23.17	42.71	16.72	0.24	0.19	15.39				99.25	0.00215089	0.839077			0.429659	1.03759	0.0175685	0.00624621	0.704964				0.0046963	3.04195	0.62132	0.552889
509	DZ-003	Spl	2	c	1	DZ-3-spl2-c	0.06	0.72	26.64	40.16	15.74	0.15	0.2	16.1				99.77	0.00179938	0.941588			0.39477	0.952225	0.0162444	0.0038102	0.719789				0.00482484	3.03505	0.645806	0.502808
510	DZ-003	Spl	2	r	1	DZ-3-spl2-r1	0.07	0.72	23.04	42.81	16.1	0.24	0.23	15.8				99.01	0.00215166	0.834667			0.413875	1.04039	0.0166498	0.00624844	0.724004				0.00568703	3.04367	0.636275	0.554857
511	DZ-003	Spl	2	r	2	DZ-3-spl2-r2	0.06	0.73	24.43	42.78	16.4	0.2	0.21	15.06				99.87	0.00182306	0.874841			0.416737	1.0277	0.0166868	0.00514713	0.682155				0.00513277	3.03022	0.620767	0.540172
512	HAM-001	Spl	1	c	1	HAM-1-spl1-c	0.09	0.19	43.25	23.66	12.94	0.09	0.29	19.01				99.52	0.00249211	1.41145			0.299659	0.517981	0.00395802	0.00211083	0.784721				0.00645959	3.02883	0.723659	0.268463
513	HAM-001	Spl	1	r	1	HAM-1-spl1-r	0.04	0.24	39.66	26.93	12.96	0.15	0.28	18.73				98.99	0.00112991	1.32035			0.306165	0.601441	0.00510027	0.00358888	0.78873				0.00636242	3.03287	0.720371	0.312958
514	HAM-001	Spl	2	c	1	HAM-1-spl2-c	0.07	0.16	47.76	18.93	11.87	0.14	0.38	19.81				99.12	0.00190286	1.53013			0.269853	0.40685	0.00327212	0.00322346	0.80279				0.0083095	3.02633	0.748422	0.210043
515	HAM-001	Spl	2	r	1	HAM-1-spl2-r	0.07	0.2	46.92	19.38	11.86	0.14	0.35	20.19				99.11	0.00190749	1.50688			0.270282	0.417535	0.0041001	0.0032313	0.82018				0.00767211	3.03179	0.75214	0.216967
516	HAM-012	Spl	1	c	1	HAM012-spl-1-c	0.03	0.16	47.41	19.19	13.63	0.14	0.38	19.22				100.16	0.000814394	1.51684			0.309441	0.411873	0.00326763	0.00321904	0.777813				0.00829811	3.03156	0.715392	0.213548
517	HAM-012	Spl	1	r	1	HAM012-spl-1-r	0.07	0.14	42.86	24.19	13.73	0.13	0.31	18.47				99.9	0.00194194	1.40135			0.31855	0.530578	0.00292191	0.00305469	0.76386				0.00691803	3.02917	0.705703	0.274637
518	HAM-012	Spl	2	c	1	HAM012-dead-spl-c	0.01	0.52	30.67	34.86	16.4	0.19	0.26	16.3				99.21	0.000296846	1.073			0.40714	0.818152	0.0116128	0.00477717	0.72132				0.00620851	3.04251	0.639207	0.43262
519	HAM-012	Spl	2	c	2	HAM012-dead-spl-c2	0.05	0.47	30.94	35.45	16.94	0.23	0.28	16.05				100.41	0.00146993	1.07202			0.416495	0.823985	0.010395	0.00572719	0.703415				0.00662168	3.04013	0.6281	0.434589
520	SOU-002	Spl	1	c	1	SOU002-spl1c	0.06	0.05	57.65	9.15	11.18	0.08	0.39	20.85				99.41	0.0015607	1.76735			0.243208	0.188176	0.000978447	0.00176256	0.808504				0.00816045	3.0197	0.768751	0.0962277
521	SOU-002	Spl	1	r	1	SOU002-spl1r	0.82	0.08	57.51	9.07	11.07	0.09	0.41	20.54				99.59	0.0212338	1.75515			0.239734	0.185693	0.00155849	0.00197398	0.792908				0.00854044	3.00679	0.767844	0.0956768
522	SOU-002	Spl	2	c	1	SOU002-spl2c	0.06	0.06	56.52	10.13	11.3	0.09	0.47	20.7				99.33	0.00156959	1.74258			0.247218	0.209516	0.00118082	0.00199417	0.807259				0.0098904	3.0212	0.765554	0.107329
523	SOU-002	Spl	2	r	1	SOU002-spl2r	0.04	0.08	57	9.97	11.52	0.12	0.44	20.74				99.91	0.00104031	1.74716			0.250567	0.205009	0.00156528	0.00264344	0.804118				0.00920529	3.02131	0.762425	0.105016
524	HAM-018	Spl	1	c	1	HAM018-spl1c	0.06	0.11	54.81	9.18	15.6	0.12	0.37	18.54				98.79	0.00160908	1.73238			0.349881	0.194646	0.00221932	0.0027258	0.741217				0.00798199	3.03266	0.679332	0.101008
525	HAM-018	Spl	1	r	1	HAM018-spl1r	0.01	0.09	54.99	8.99	15.81	0.19	0.44	18.74				99.26	0.000267191	1.73166			0.353283	0.189914	0.00180911	0.00429993	0.74645				0.00945709	3.03714	0.678756	0.0988327
526	HAM-018	Spl	2	c	1	HAM018-spl3c	0.04	0.07	55.04	8.99	15.72	0.16	0.44	18.66				99.12	0.00106949	1.73441			0.35151	0.190043	0.00140804	0.00362346	0.743768				0.00946351	3.0353	0.679068	0.0987518
527	HAM-018	Spl	3	c	1	HAM018-spl4c	0.05	0.09	56.23	7.94	15.21	0.18	0.46	18.71				98.87	0.00133162	1.76495			0.338771	0.167188	0.00180323	0.00406038	0.742834				0.00985483	3.0308	0.686788	0.0865298
528	HAM-018	Spl	3	c	1	HAM018-spl4c	0.03	0.12	56.87	7.83	14.93	0.11	0.43	18.55				98.87	0.000796583	1.77971			0.331541	0.164379	0.00239713	0.00247393	0.734281				0.00918461	3.02476	0.688934	0.0845533
529	HAM-018	Spl	4	c	1	HAM018-spl5c	0.02	0.12	56.1	7.96	15.41	0.18	0.43	18.75				98.97	0.000532711	1.76109			0.343267	0.167629	0.0024046	0.00406088	0.744512				0.00921324	3.03271	0.684433	0.0869124
530	DZ-009	Spl	1	c	1	DZ009-spl1c	0.03	0.1	52.75	14.87	10.23	0.11	0.37	20.42				98.88	0.000797408	1.65248			0.227407	0.312496	0.00199968	0.00247649	0.80914				0.00791122	3.01471	0.780611	0.159033
531	DZ-009	Spl	1	r	1	DZ009-spl1r	0.04	0.13	52.19	14.95	10.56	0.14	0.37	20.59				98.97	0.00106516	1.63794			0.235172	0.314753	0.00260434	0.00315768	0.817371				0.00792571	3.01999	0.776568	0.16119
532	DZ-009	Spl	2	c	1	DZ009-spl2-dead1	0.1	0.17	46.31	20.98	11.75	0.09	0.24	19.03				98.67	0.0027459	1.4987			0.269831	0.455476	0.00351184	0.00209321	0.778991				0.00530125	3.01665	0.74273	0.233078
533	DZ-009	Spl	2	c	2	DZ009-spl2-dead2	0.05	0.25	40.46	28.04	12.29	0.17	0.22	17.3				98.78	0.00141196	1.34659			0.29025	0.626045	0.0053112	0.00406618	0.728294				0.00499755	3.00696	0.715034	0.317365
534	DZ-009	Spl	2	c	3	DZ009-spl2-dead3	0.09	0.22	42.65	25.44	12.6	0.12	0.22	18.18				99.52	0.00250002	1.39629			0.292711	0.558718	0.00459752	0.00282337	0.752841				0.00491593	3.0154	0.720041	0.285788
535	DZ-009	Spl	3	c	1	DZ009-spl3c	0.01	0.07	52.35	15.44	10.26	0.17	0.31	20.37				98.98	0.000266091	1.64173			0.228321	0.324827	0.00140129	0.00383146	0.808035				0.00663551	3.01505	0.779689	0.165175
536	GU-001	Spl	1	c	1	GU001-spl1c	0.03	0.02	42.46	25.43	12.66	0.13	0.26	19.15				100.14	0.000828918	1.38269			0.292545	0.555535	0.000415739	0.00304242	0.788801				0.00577891	3.02964	0.729463	0.28662
537	GU-001	Spl	1	r	1	GU001-spl1r	0.04		42.63	25.27	12.52	0.18	0.25	18.28				99.17	0.00111508	1.4006			0.291888	0.556961		0.00425013	0.759677				0.00560618	3.0201	0.722425	0.284517
538	GU-001	Spl	2	c	1	GU001-spl2c		0.04	46.23	21.09	11.94	0.14	0.28	19.21				98.93		1.49514			0.274015	0.457565	0.000825775	0.00325398	0.785846				0.00618076	3.02282	0.741462	0.234324
539	GU-001	Spl	2	r	1	GU001-spl2r	0.08	0.06	46.64	21.39	11.85	0.14	0.33	18.94				99.43	0.00218281	1.49982			0.270404	0.461436	0.00123162	0.00323549	0.770397				0.00724307	3.01596	0.740197	0.235275
540	SOU-003	Spl	1	c	1	SOU003-spl1c	0.08	0.48	45.86	19.32	13.85	0.14	0.31	19.04				99.08	0.0022038	1.48892			0.319081	0.420789	0.00994773	0.0032666	0.781912				0.00686952	3.03299	0.710188	0.220342
541	SOU-003	Spl	1	r	1	SOU003-spl1r	0.07	0.35	47.18	18.55	13.54	0.14	0.31	19.41				99.55	0.00190865	1.51615			0.308755	0.399895	0.00717953	0.00323326	0.788972				0.00679942	3.03289	0.718732	0.208709
542	SOU-003	Spl	2	c	1	SOU003-spl2c	0.02	0.32	46.89	18.5	13.5	0.17	0.3	19.37				99.07	0.000548291	1.51502			0.309516	0.400985	0.00659981	0.00394744	0.791625				0.00661583	3.03485	0.718913	0.209282
543	SOU-003	Spl	2	r	1	SOU003-spl2r	0.07	0.42	44.82	19.75	13.88	0.09	0.32	18.99				98.34	0.00194876	1.47058			0.32316	0.434713	0.0087965	0.00212221	0.788123				0.00716627	3.03661	0.709201	0.228161
544	DZ-002	Spl	1	c	1	DZ002_spl1c	0.0486	0.6328	29.3668	36.327	16.6205	0.2571	0.2545	16.4869				99.9942	0.00144055	1.0259			0.412008	0.85133	0.0141111	0.00645477	0.728519				0.00606825	3.04583	0.638757	0.453503
545	DZ-002	Spl	1	r	1	DZ002_spl1r	0.0657	0.7684	20.2982	45.273	18.0727	0.3301	0.1531	14.3963				99.3575	0.00205566	0.748514			0.472909	1.11996	0.0180873	0.00874818	0.6715				0.0038534	3.04562	0.586766	0.599397
546	DZ-002	Spl	2	c	1	DZ002_spl2c	0.0783	0.2419	23.8037	44.712	15.2836	0.3044	0.1597	16.0011				100.585	0.0023611	0.845964			0.38543	1.06598	0.00548767	0.00777467	0.7193				0.00387382	3.03618	0.651109	0.557538
547	DZ-002	Spl	2	r	1	DZ002_spl2r	0.0856	0.2417	22.1714	46.0725	15.9386	0.288	0.1777	14.5904				99.5659	0.00263714	0.805022			0.410655	1.12221	0.00560191	0.00751514	0.670093				0.00440381	3.02814	0.620027	0.582292
548	HAM-005b	Spl	1	c	1	HAM005b_spl1c	0.0338	0.1171	47.2556	19.8016	12.2809	0.1594	0.3097	19.6196				99.5777	0.000918656	1.51372			0.279148	0.425511	0.00239438	0.00366952	0.794941				0.0067711	3.02707	0.740107	0.219423
549	HAM-005b	Spl	1	r	1	HAM005b_spl1r	0.0339	0.1255	43.3558	23.7324	12.9423	0.1817	0.2654	18.7985				99.4355	0.000939942	1.41679			0.30011	0.520257	0.00261785	0.00426719	0.777022				0.0059195	3.02792	0.72138	0.268583
550	HAM-005b	Spl	2	c	1	HAM005b_spl2c	0.0413	0.1457	48.3686	18.3552	12.1124	0.165	0.3113	19.8601				99.3596	0.00111844	1.54377			0.274323	0.393004	0.0029684	0.00378471	0.801776				0.00678148	3.02753	0.745077	0.202917
551	HAM-005b	Spl	2	r	1	HAM005b_spl2r	0.0433	0.1753	43.658	22.3659	12.7959	0.1648	0.3018	18.9045				98.4095	0.00120847	1.43604			0.298666	0.493524	0.00368069	0.00389574	0.78654				0.00677561	3.03033	0.724784	0.25577
552	HAM-005b	Spl	3	c	1	HAM005b_spl3c	0.0264	0.1031	48.149	18.371	12.612	0.1713	0.3308	19.6571				99.4207	0.000716523	1.54017			0.286272	0.394216	0.00210516	0.00393794	0.795343				0.00722228	3.02998	0.735329	0.203794
553	HAM-005b	Spl	3	r	1	HAM005b_spl3r	0.3037	0.1342	43.9522	22.299	13.3382	0.1859	0.2806	18.633				99.1268	0.00842024	1.4362			0.309275	0.48881	0.00279919	0.00436561	0.770142				0.0062582	3.02627	0.71348	0.253925
554	DZ-007	Spl	1	c	1	DZ007_spl1c	0.0764	0.1481	49.2226	16.0431	12.4788	0.1628	0.3266	18.9208				97.3792	0.00210087	1.59524			0.286977	0.348794	0.0030638	0.0037918	0.775628				0.00722444	3.02282	0.729931	0.179418
555	HAM-017	Spl	1	c	1	HAM017_spl1c	0.044	0.2458	35.8428	30.9971	15.1342	0.2443	0.2228	17.1355				99.8665	0.00126462	1.21413			0.363778	0.704376	0.00531485	0.00594727	0.7342				0.00515117	3.03417	0.668684	0.367148
556	HAM-017	Spl	1	r	1	HAM017_spl1r	0.0443	0.225	32.3364	34.9397	14.9387	0.2544	0.1826	16.191				99.1121	0.00130272	1.12072			0.367392	0.812349	0.00497773	0.00633653	0.709792				0.00431948	3.02719	0.658933	0.420239
557	HAM-017	Spl	2	c	1	HAM017_spl2c	0.0373	0.2476	36.7825	29.7937	14.7317	0.2148	0.214	17.0031				99.0247	0.0010747	1.24904			0.354977	0.678701	0.00536698	0.00524203	0.730325				0.00495993	3.02969	0.672923	0.352071
558	HAM-017	Spl	2	r	1	HAM017_spl2r	0.0519	0.2286	30.5411	36.992	14.51	0.2346	0.1518	16.717				99.427	0.00152999	1.06111			0.35773	0.86219	0.00506987	0.00585779	0.734661				0.00359977	3.03175	0.672526	0.448287
559	HAM-017	Spl	3	r	1	HAM017_spl3r	0.0621	0.2235	30.883	34.5585	15.3661	0.2434	0.2038	17.1797				98.7201	0.00184172	1.07946			0.381123	0.810331	0.00498667	0.00611419	0.759551				0.00486205	3.04827	0.665879	0.428793
560	HAM-017	Spl	4	c	1	HAM017_spl4c	0.0608	0.2417	36.448	29.9658	14.8583	0.2119	0.2277	16.6827				98.6969	0.00176083	1.24406			0.359874	0.686142	0.00526612	0.00519792	0.720259				0.00530468	3.02787	0.666824	0.355476
561	HAM-017	Spl	4	r	1	HAM017_spl4r	0.621	0.2749	28.9647	37.517	13.6949	0.2649	0.184	16.3623				97.8837	0.0185967	1.02228			0.342982	0.888274	0.00619325	0.0067191	0.730461				0.00443245	3.01993	0.680484	0.464931
562	HAM-001	Plag	1	i	1	HAM-1-opx1-r	61.45	0.27	18.25	0.12	1.59	0.03		1.97	2.62	4.97	5.01	96.28	2.8778	1.0073			0.0622736	0.00444319	0.00951268	0.00119	0.137535	0.131466	0.451276	0.29932		4.98211
563	HAM-012	Plag	1	i	1	HAM012-phs-1-dead-spl	57.36	0.03	23.92	0.58	0.34		0.04	0.06	6.87	8.04	0.51	97.75	2.64291	1.29895			0.0131015	0.0211289	0.00103991		0.0041213	0.339159	0.718252	0.029978	0.00148257	5.07012
564	HAM-012	Plag	2	i	1	HAM012-phs-2-dead-spl	57.23	0.03	24.17	0.44	0.27	0.03		0.06	7.17	7.62	0.51	97.53	2.63898	1.31354			0.0104122	0.0160413	0.00104072	0.00117171	0.0041245	0.354245	0.681262	0.0300013		5.05082
565	DZ-004
566	DZ-005
567	DZ-010b
568	GU-002
569	GU-003
570	GU-007
571	HAM-006
572	HAM-007
573	HAM-009
574	HAM-011
575	HAM-016
576	SOU-001
[truncated: 68 more columns]
